# Supplementary material
Source: Elsevier journal article supplement (https://comptes-rendus.academie-sciences.fr/geoscience/article/10.1016/j.crte.2018.06.004/file/attach/mmc7.pdf)
Supplement: mmc7 [file mmc7.pdf]

**Supplementary table S2:** Morphology, morphotype, and U-Th-Pb data of all zircons from samples D30, D43, D66, D66b, D67.

| Number                                                                                                | grain | <sup>207</sup> Pb <sup>a</sup><br>(cps) | U <sup>b</sup><br>(ppm) | Pb <sup>b</sup><br>(ppm) | Th <sup>b</sup><br>U | <sup>206</sup> Pb <sup>c</sup><br><sup>204</sup> Pb | <sup>206</sup> Pb <sup>c</sup><br><sup>238</sup> U | 2 σ  | <sup>207</sup> Pb <sup>c</sup><br><sup>235</sup> U | 2 σ  | <sup>207</sup> Pb <sup>c</sup><br><sup>206</sup> Pb | 2 σ  | rho <sup>d</sup> | <sup>206</sup> Pb<br><sup>238</sup> U | 2 σ | <sup>207</sup> Pb<br><sup>235</sup> U | 2 σ  | <sup>207</sup> Pb<br><sup>206</sup> Pb | 2 σ  | conc.<br>% | length<br>[μm] | width<br>[μm] | width<br>length | round-<br>ness | surface | Pupin |
|-------------------------------------------------------------------------------------------------------|-------|-----------------------------------------|-------------------------|--------------------------|----------------------|-----------------------------------------------------|----------------------------------------------------|------|----------------------------------------------------|------|-----------------------------------------------------|------|------------------|---------------------------------------|-----|---------------------------------------|------|----------------------------------------|------|------------|----------------|---------------|-----------------|----------------|---------|-------|
| <b>D30, quartzite, n = 98/140, 90-110% conc., Sebkhha Gezmayet unit, N22°52'30.60", W15°18'04.20"</b> |       |                                         |                         |                          |                      |                                                     |                                                    |      |                                                    |      |                                                     |      |                  |                                       |     |                                       |      |                                        |      |            |                |               |                 |                |         |       |
| D30-seq1-a01                                                                                          | 001   | 9677                                    | 84                      | 10                       | 0.33                 | 900                                                 | 0.10403                                            | 2.4  | 1.01259                                            | 4.6  | 0.07059                                             | 3.9  | 0.53             | 638                                   | 15  | 710                                   | 24   | 946                                    | 80   | 67         | 77             | 48            | 0.62            | 6              | 1       | S24   |
| D30-seq1-a02                                                                                          | 002   | 50366                                   | 65                      | 30                       | 0.66                 | 1233                                                | 0.35534                                            | 2.2  | 6.39064                                            | 2.7  | 0.13044                                             | 1.5  | 0.84             | 1960                                  | 38  | 2031                                  | 24   | 2104                                   | 26   | 93         | 135            | 60            | 0.45            | 8              | 2       | x     |
| D30-seq1-a03                                                                                          | 003   | 17432                                   | 184                     | 22                       | 0.59                 | 18787                                               | 0.09701                                            | 2.5  | 0.84713                                            | 2.9  | 0.06334                                             | 1.5  | 0.86             | 597                                   | 14  | 623                                   | 14   | 720                                    | 31   | 83         | 84             | 53            | 0.63            | 5              | 2       | S06   |
| D30-seq1-a04                                                                                          | 004   | 264205                                  | 451                     | 151                      | 0.27                 | 7039                                                | 0.30959                                            | 2.5  | 5.24870                                            | 2.7  | 0.12296                                             | 1.0  | 0.93             | 1739                                  | 39  | 1861                                  | 24   | 2000                                   | 18   | 87         | 89             | 49            | 0.55            | 7              | 2       | S19   |
| D30-seq1-a05                                                                                          | 005   | 26804                                   | 103                     | 14                       | 0.56                 | 361                                                 | 0.10313                                            | 2.3  | 0.86819                                            | 7.1  | 0.06106                                             | 6.7  | 0.32             | 633                                   | 14  | 635                                   | 34   | 641                                    | 144  | 99         | 87             | 39            | 0.45            | 6              | 1       | x     |
| D30-seq1-a06                                                                                          | 006   | 14287                                   | 167                     | 19                       | 0.36                 | 5212                                                | 0.10472                                            | 2.3  | 0.88771                                            | 3.0  | 0.06148                                             | 1.9  | 0.77             | 642                                   | 14  | 645                                   | 14   | 656                                    | 41   | 98         | 97             | 46            | 0.48            | 5              | 2       | S24   |
| D30-seq1-a07                                                                                          | 007   | 19118                                   | 190                     | 21                       | 0.39                 | 3627                                                | 0.09940                                            | 2.7  | 0.83737                                            | 4.0  | 0.06110                                             | 3.0  | 0.67             | 611                                   | 16  | 618                                   | 19   | 643                                    | 64   | 95         | 133            | 61            | 0.46            | 8              | 1       | x     |
| D30-seq1-a08                                                                                          | 008   | 125367                                  | 216                     | 72                       | 0.11                 | 107763                                              | 0.32830                                            | 2.2  | 5.48990                                            | 2.5  | 0.12128                                             | 1.2  | 0.88             | 1830                                  | 34  | 1899                                  | 21   | 1975                                   | 21   | 93         | 98             | 53            | 0.54            | 8              | 1       | x     |
| D30-seq1-a09                                                                                          | 009   | 98508                                   | 223                     | 66                       | 0.24                 | 13278                                               | 0.27537                                            | 3.2  | 4.32524                                            | 3.4  | 0.11392                                             | 1.1  | 0.94             | 1568                                  | 45  | 1698                                  | 28   | 1863                                   | 20   | 84         | 75             | 54            | 0.72            | 7              | 1       | x     |
| D30-seq1-a10                                                                                          | 010   | 134157                                  | 104                     | 64                       | 0.35                 | 21682                                               | 0.53025                                            | 2.9  | 14.02626                                           | 3.1  | 0.19185                                             | 1.1  | 0.94             | 2743                                  | 66  | 2751                                  | 30   | 2758                                   | 18   | 99         | 123            | 63            | 0.51            | 9              | 1       | x     |
| D30-seq1-a11                                                                                          | 011   | 10634                                   | 126                     | 15                       | 0.21                 | 3923                                                | 0.12234                                            | 2.6  | 1.08738                                            | 4.7  | 0.06446                                             | 3.9  | 0.55             | 744                                   | 18  | 747                                   | 25   | 757                                    | 82   | 98         | 114            | 52            | 0.46            | 7              | 1       | S25   |
| D30-seq1-a12                                                                                          | 012   | 24430                                   | 271                     | 28                       | 0.45                 | 974                                                 | 0.08839                                            | 3.0  | 0.74500                                            | 4.2  | 0.06113                                             | 3.0  | 0.72             | 546                                   | 16  | 565                                   | 19   | 644                                    | 63   | 85         | 86             | 56            | 0.65            | 8              | 2       | x     |
| D30-seq1-a13                                                                                          | 013   | 17221                                   | 242                     | 23                       | 0.42                 | 28704                                               | 0.08907                                            | 2.1  | 0.76797                                            | 2.6  | 0.06253                                             | 1.5  | 0.82             | 550                                   | 11  | 579                                   | 12   | 692                                    | 32   | 79         | 95             | 41            | 0.42            | 7              | 1       | x     |
| D30-seq1-a14                                                                                          | 014   | 12165                                   | 149                     | 15                       | 0.15                 | 982                                                 | 0.10195                                            | 2.4  | 0.85615                                            | 3.7  | 0.06091                                             | 2.8  | 0.65             | 626                                   | 14  | 628                                   | 17   | 636                                    | 60   | 98         | 116            | 78            | 0.68            | 7              | 2       | S24   |
| D30-seq1-a15                                                                                          | 015   | 13740                                   | 170                     | 19                       | 0.84                 | 738                                                 | 0.08822                                            | 2.4  | 0.69242                                            | 5.4  | 0.05692                                             | 4.8  | 0.45             | 545                                   | 13  | 534                                   | 23   | 489                                    | 106  | 112        | 85             | 43            | 0.51            | 7              | 2       | S23   |
| D30-seq1-a16                                                                                          | 016   | 36927                                   | 526                     | 49                       | 0.45                 | 999                                                 | 0.08510                                            | 2.5  | 0.72108                                            | 3.5  | 0.06145                                             | 2.4  | 0.71             | 526                                   | 12  | 551                                   | 15   | 655                                    | 52   | 80         | 95             | 49            | 0.51            | 6              | 2       | S07   |
| D30-seq1-a17                                                                                          | 017   | 18282                                   | 248                     | 22                       | 0.36                 | 701                                                 | 0.08230                                            | 3.5  | 0.70548                                            | 5.8  | 0.06217                                             | 4.6  | 0.61             | 510                                   | 17  | 542                                   | 24   | 680                                    | 98   | 75         | 63             | 47            | 0.74            | 7              | 2       | x     |
| D30-seq1-a18                                                                                          | 018   | 46050                                   | 504                     | 55                       | 0.46                 | 550                                                 | 0.09779                                            | 2.5  | 0.80934                                            | 3.7  | 0.06002                                             | 2.7  | 0.67             | 601                                   | 14  | 602                                   | 17   | 604                                    | 59   | 100        | 92             | 45            | 0.48            | 8              | 2       | x     |
| D30-seq1-a19                                                                                          | 019   | 27366                                   | 370                     | 37                       | 0.44                 | 4278                                                | 0.09153                                            | 2.2  | 0.79780                                            | 2.9  | 0.06321                                             | 1.8  | 0.77             | 565                                   | 12  | 596                                   | 13   | 715                                    | 39   | 79         | 110            | 42            | 0.38            | 4              | 1       | S24   |
| D30-seq1-a20                                                                                          | 020   | 295256                                  | 997                     | 184                      | 0.24                 | 3893                                                | 0.15675                                            | 5.8  | 2.49274                                            | 6.0  | 0.11534                                             | 1.8  | 0.95             | 939                                   | 50  | 1270                                  | 45   | 1885                                   | 33   | 50         | 124            | 66            | 0.53            | 8              | 2       | x     |
| D30-seq1-a21                                                                                          | 021   | 7594                                    | 103                     | 12                       | 0.62                 | 13045                                               | 0.10048                                            | 2.4  | 0.83837                                            | 3.8  | 0.06051                                             | 2.9  | 0.64             | 617                                   | 14  | 618                                   | 18   | 622                                    | 63   | 99         | 75             | 53            | 0.71            | 6              | 1       | S24   |
| D30-seq1-a22                                                                                          | 022   | 5234                                    | 52                      | 6                        | 0.53                 | 294                                                 | 0.09838                                            | 2.2  | 1.43997                                            | 9.0  | 0.10615                                             | 8.8  | 0.25             | 605                                   | 13  | 906                                   | 56   | 1734                                   | 161  | 35         | 99             | 47            | 0.48            | 6              | 2       | x     |
| D30-seq1-a23                                                                                          | 023   | 30679                                   | 60                      | 26                       | 0.70                 | 1225                                                | 0.38031                                            | 2.6  | 6.95034                                            | 3.1  | 0.13255                                             | 1.5  | 0.86             | 2078                                  | 47  | 2105                                  | 27   | 2132                                   | 27   | 97         | 91             | 37            | 0.41            | 8              | 1       | x     |
| D30-seq1-a24                                                                                          | 024   | 58443                                   | 159                     | 60                       | 0.43                 | 6901                                                | 0.34734                                            | 2.2  | 5.89774                                            | 2.4  | 0.12315                                             | 1.0  | 0.91             | 1922                                  | 37  | 1961                                  | 21   | 2002                                   | 18   | 96         | 84             | 42            | 0.49            | 8              | 3       | x     |
| D30-seq1-a25                                                                                          | 025   | 12102                                   | 134                     | 18                       | 0.35                 | 19576                                               | 0.12549                                            | 2.3  | 1.11419                                            | 3.1  | 0.06439                                             | 2.1  | 0.74             | 762                                   | 17  | 760                                   | 17   | 755                                    | 44   | 101        | 116            | 69            | 0.60            | 6              | 1       | S22   |
| D30-seq1-a26                                                                                          | 026   | 144575                                  | 135                     | 82                       | 0.34                 | 77619                                               | 0.52622                                            | 2.2  | 14.10330                                           | 2.7  | 0.19438                                             | 1.5  | 0.83             | 2725                                  | 49  | 2757                                  | 25   | 2780                                   | 24   | 98         | 131            | 66            | 0.51            | 8              | 2       | x     |
| D30-seq1-a27                                                                                          | 027   | 7349                                    | 122                     | 13                       | 0.42                 | 2195                                                | 0.10032                                            | 2.7  | 0.83475                                            | 4.2  | 0.06035                                             | 3.2  | 0.64             | 616                                   | 16  | 616                                   | 20   | 616                                    | 69   | 100        | 119            | 78            | 0.65            | 8              | 2       | x     |
| D30-seq1-a28                                                                                          | 028   | 63615                                   | 135                     | 79                       | 1.55                 | 6467                                                | 0.35706                                            | 2.3  | 6.30462                                            | 2.5  | 0.12806                                             | 1.0  | 0.92             | 1968                                  | 39  | 2019                                  | 22   | 2072                                   | 18   | 95         | 175            | 72            | 0.41            | 8              | 2       | x     |
| D30-seq1-a29                                                                                          | 029   | 102477                                  | 217                     | 80                       | 0.09                 | 85086                                               | 0.36700                                            | 2.5  | 6.35798                                            | 2.8  | 0.12565                                             | 1.4  | 0.87             | 2015                                  | 43  | 2026                                  | 25   | 2038                                   | 25   | 99         | 125            | 67            | 0.54            | 9              | 1       | x     |
| D30-seq1-a30                                                                                          | 030   | 6677                                    | 100                     | 11                       | 0.34                 | 11442                                               | 0.10221                                            | 2.1  | 0.85561                                            | 3.1  | 0.06071                                             | 2.3  | 0.68             | 627                                   | 13  | 628                                   | 15   | 629                                    | 50   | 100        | 145            | 46            | 0.32            | 7              | 2       | S25   |
| D30-seq1-a31                                                                                          | 031   | 161501                                  | 241                     | 127                      | 0.29                 | 31069                                               | 0.47916                                            | 2.3  | 11.45019                                           | 2.5  | 0.17331                                             | 1.1  | 0.90             | 2524                                  | 48  | 2561                                  | 24   | 2590                                   | 18   | 97         | 170            | 91            | 0.54            | 9              | 2       | x     |
| D30-seq1-a32                                                                                          | 032   | 23052                                   | 73                      | 26                       | 0.31                 | 19208                                               | 0.32577                                            | 2.3  | 4.98750                                            | 2.9  | 0.11104                                             | 1.7  | 0.80             | 1818                                  | 36  | 1817                                  | 25   | 1816                                   | 31   | 100        | 77             | 62            | 0.81            | 7              | 2       | S24   |
| D30-seq1-a33                                                                                          | 033   | 17181                                   | 328                     | 35                       | 0.37                 | 29593                                               | 0.09877                                            | 2.4  | 0.82391                                            | 3.0  | 0.06050                                             | 1.8  | 0.81             | 607                                   | 14  | 610                                   | 14   | 621                                    | 39   | 98         | 162            | 71            | 0.44            | 9              | 2       | x     |
| D30-seq1-a34                                                                                          | 034   | 24818                                   | 441                     | 47                       | 0.48                 | 6279                                                | 0.09372                                            | 2.4  | 0.80145                                            | 2.8  | 0.06202                                             | 1.4  | 0.86             | 578                                   | 13  | 598                                   | 13   | 675                                    | 31   | 86         | 115            | 63            | 0.55            | 6              | 2       | S08   |
| D30-seq1-a35                                                                                          | 035   | 9849                                    | 169                     | 23                       | 0.47                 | 4260                                                | 0.12179                                            | 2.4  | 1.08613                                            | 4.2  | 0.06468                                             | 3.5  | 0.57             | 741                                   | 17  | 747                                   | 23   | 764                                    | 73   | 97         | 92             | 69            | 0.75            | 7              | 2       | x     |
| D30-seq1-a36                                                                                          | 036   | 9565                                    | 192                     | 22                       | 0.43                 | 7999                                                | 0.10231                                            | 3.0  | 0.86392                                            | 3.9  | 0.06124                                             | 2.4  | 0.79             | 628                                   | 18  | 632                                   | 18   | 648                                    | 51   | 97         | 104            | 68            | 0.65            | 5              | 2       | S24   |
| D30-seq1-a37                                                                                          | 037   | 6500                                    | 123                     | 15                       | 0.52                 | 10996                                               | 0.10456                                            | 2.4  | 0.88879                                            | 3.9  | 0.06165                                             | 3.0  | 0.62             | 641                                   | 15  | 646                                   | 19   | 662                                    | 65   | 97         | 131            | 53            | 0.40            | 6              | 2       | S25   |
| D30-seq1-a38                                                                                          | 038   | 11431                                   | 223                     | 25                       | 0.32                 | 12808                                               | 0.10666                                            | 2.6  | 0.90785                                            | 4.6  | 0.06173                                             | 3.8  | 0.57             | 653                                   | 16  | 656                                   | 22   | 665                                    | 81   | 98         | 108            | 63            | 0.58            | 7              | 2       | S25   |
| D30-seq1-a39                                                                                          | 039   | 10783                                   | 212                     | 19                       | 0.44                 | 845                                                 | 0.08220                                            | 3.6  | 0.91645                                            | 4.8  | 0.08086                                             | 3.2  | 0.75             | 509                                   | 18  | 660                                   | 24   | 1218                                   | 63   | 42         | 79             | 53            | 0.67            | 6              | 1       | x     |
| D30-seq1-a40                                                                                          | 040   | 14283                                   | 288                     | 33                       | 0.83                 | 1509                                                | 0.09274                                            | 2.2  | 0.91578                                            | 3.3  | 0.07162                                             | 2.5  | 0.67             | 572                                   | 12  | 660                                   | 16   | 975                                    | 50   | 59         | 107            | 52            | 0.49            | 5              | 2       | S08   |
| D30-seq1-a41                                                                                          | 041   | 74005                                   | 139                     | 88                       | 0.75                 | 9638                                                | 0.51962                                            | 3.2  | 13.47440                                           | 3.5  | 0.18807                                             | 1.3  | 0.93             | 2698                                  | 71  | 2713                                  | 33   | 2725                                   | 21   | 99         | 105            | 58            | 0.55            | 8              | 3       | x     |
| D30-seq1-a42                                                                                          | 042   | 4687                                    | 89                      | 10                       | 0.46                 | 550                                                 | 0.10274                                            | 2.6  | 1.11368                                            | 5.8  | 0.07862                                             | 5.2  | 0.44             | 630                                   | 15  | 760                                   | 31   | 1163                                   | 103  | 54         | 108            | 68            | 0.63            | 6              | 2       | S13   |
| D30-seq1-a43                                                                                          | 043   | 13661                                   | 331                     | 35                       | 0.40                 | 22818                                               | 0.09654                                            | 2.3  | 0.83402                                            | 3.3  | 0.06266                                             | 2.4  | 0.69             | 594                                   | 13  | 616                                   | 15   | 697                                    | 51   | 85         | 142            | 55            | 0.39            | 6              | 2       | S13   |
| D30-seq1-a44                                                                                          | 044   | 7776                                    | 196                     | 20                       | 0.48                 | 2022                                                | 0.09795                                            | 3.0  | 0.90631                                            | 3.9  | 0.06711                                             | 2.6  | 0.75             | 602                                   | 17  | 655                                   | 19   | 841                                    | 54   | 72         | 94             | 48            | 0.51            | 4              | 2       | S25   |
| D30-seq1-a45                                                                                          | 045   | 9867                                    | 226                     | 22                       | 0.55                 | 909                                                 | 0.08456                                            | 3.0  | 0.91100                                            | 5.2  | 0.07814                                             | 4.2  | 0.58             | 523                                   | 15  | 658                                   | 25   | 1150                                   | 84   | 45         | 91             | 54            | 0.59            | 5              | 1       | S03   |
| D30-seq1-a46                                                                                          | 046   | 365                                     | 4                       | 0                        | 0.62                 | 206                                                 | 0.09670                                            | 17.9 | 1.99275                                            | 94.3 | 0.14946                                             | 92.6 | 0.19             | 595                                   | 102 | 1113                                  | 1003 | 2340                                   | 1584 | 25         | 91             | 48            | 0.52            | 8              | 1       | x     |
| D30-seq1-a47                                                                                          | 047   | 6340                                    | 189                     | 18                       | 0.47                 | 10669                                               | 0.09121                                            | 2.2  | 0.77900                                            | 4.1  | 0.06194                                             | 3.5  | 0.54             | 563                                   | 12  | 585                                   | 19   | 672                                    | 74   | 84         | 86             | 40            | 0.47            | 3              | 1       | S24   |
| D30-seq1-a48                                                                                          | 048   | 1218                                    | 42                      | 4                        | 0.60                 | 216                                                 | 0.08760                                            | 3.4  | 0.94541                                            | 14.1 | 0.07827                                             | 13.7 | 0.24             | 541                                   | 18  | 676                                   | 72   | 1154                                   | 272  | 47         | 80             | 51            | 0.64            | 7              | 1       | x     |

|              |      |        |      |     |      |        |         |     |          |     |         |     |      |      |    |      |    |      |     |            |     |     |      |    |   |         |
|--------------|------|--------|------|-----|------|--------|---------|-----|----------|-----|---------|-----|------|------|----|------|----|------|-----|------------|-----|-----|------|----|---|---------|
| D30-seq1-a49 | 049  | 24195  | 182  | 59  | 0.23 | 4385   | 0.30981 | 3.0 | 4.58080  | 3.8 | 0.10724 | 2.3 | 0.79 | 1740 | 46 | 1746 | 32 | 1753 | 43  | <b>99</b>  | 100 | 62  | 0.62 | 8  | 1 | x       |
| D30-seq1-a50 | 050  | 5917   | 99   | 12  | 0.49 | 392    | 0.10757 | 2.1 | 1.33689  | 5.1 | 0.09014 | 4.6 | 0.42 | 659  | 13 | 862  | 30 | 1428 | 88  | 46         | 115 | 66  | 0.58 | 7  | 1 | S22     |
| D30-seq1-a51 | 051  | 75080  | 301  | 110 | 0.09 | 59848  | 0.36003 | 2.3 | 6.50441  | 2.6 | 0.13103 | 1.3 | 0.86 | 1982 | 39 | 2046 | 23 | 2112 | 23  | <b>94</b>  | 119 | 61  | 0.51 | 7  | 2 | x       |
| D30-seq1-a52 | 052  | 4657   | 175  | 20  | 0.60 | 2407   | 0.10216 | 2.3 | 0.85926  | 6.5 | 0.06100 | 6.1 | 0.35 | 627  | 14 | 630  | 31 | 639  | 131 | <b>98</b>  | 84  | 46  | 0.54 | 5  | 1 | S22     |
| D30-seq1-a53 | 053  | 141581 | 1036 | 242 | 0.11 | 14363  | 0.23098 | 2.6 | 3.69161  | 2.9 | 0.11591 | 1.1 | 0.93 | 1340 | 32 | 1570 | 23 | 1894 | 19  | 71         | 116 | 72  | 0.62 | 8  | 2 | x       |
| D30-seq1-a54 | 054  | 50897  | 230  | 89  | 0.17 | 41819  | 0.37059 | 2.6 | 6.49469  | 2.9 | 0.12711 | 1.4 | 0.88 | 2032 | 45 | 2045 | 26 | 2058 | 25  | <b>99</b>  | 141 | 104 | 0.74 | 7  | 2 | S25     |
| D30-seq1-a55 | 055  | 259651 | 740  | 388 | 0.21 | 152229 | 0.48682 | 2.2 | 11.91684 | 2.4 | 0.17754 | 1.0 | 0.91 | 2557 | 46 | 2598 | 23 | 2630 | 16  | <b>97</b>  | 82  | 52  | 0.64 | 8  | 1 | x       |
| D30-seq1-a56 | 056  | 27575  | 218  | 74  | 0.37 | 5910   | 0.32338 | 2.5 | 4.88983  | 3.0 | 0.10967 | 1.6 | 0.85 | 1806 | 40 | 1801 | 26 | 1794 | 29  | <b>101</b> | 167 | 42  | 0.25 | 7  | 1 | J5      |
| D30-seq1-a57 | 057  | 131737 | 391  | 201 | 0.28 | 78134  | 0.46849 | 2.1 | 11.33577 | 2.3 | 0.17549 | 0.8 | 0.93 | 2477 | 44 | 2551 | 21 | 2611 | 14  | <b>95</b>  | 94  | 62  | 0.67 | 9  | 2 | x       |
| D30-seq1-a58 | 058  | 14646  | 614  | 62  | 0.40 | 3622   | 0.09185 | 2.7 | 0.80392  | 3.2 | 0.06348 | 1.8 | 0.84 | 566  | 15 | 599  | 15 | 724  | 37  | 78         | 93  | 53  | 0.57 | 6  | 2 | S18     |
| D30-seq1-a59 | 059  | 5751   | 275  | 36  | 1.08 | 10039  | 0.09308 | 2.6 | 0.76143  | 4.0 | 0.05933 | 3.0 | 0.66 | 574  | 14 | 575  | 18 | 579  | 65  | <b>99</b>  | 181 | 121 | 0.67 | 10 | 3 | x       |
| D30-seq1-a60 | 060  | 4281   | 94   | 10  | 0.51 | 6522   | 0.09876 | 2.6 | 0.82669  | 3.5 | 0.06071 | 2.4 | 0.73 | 607  | 15 | 612  | 16 | 629  | 52  | <b>97</b>  | 82  | 53  | 0.65 | 2  | 1 | S17     |
| D30-seq2-b01 | 061  | 48455  | 156  | 20  | 0.35 | 191    | 0.09919 | 2.3 | 0.82309  | 3.8 | 0.06018 | 3.0 | 0.62 | 610  | 14 | 610  | 18 | 610  | 64  | <b>100</b> | 142 | 78  | 0.55 | 6  | 1 | S25     |
| D30-seq2-b02 | 062  | 23526  | 173  | 20  | 0.53 | 1088   | 0.10076 | 2.0 | 0.84066  | 3.7 | 0.06051 | 3.1 | 0.53 | 619  | 12 | 620  | 17 | 622  | 67  | <b>100</b> | 80  | 51  | 0.64 | 7  | 2 | S24     |
| D30-seq2-b03 | 062B | 49299  | 243  | 31  | 0.58 | 317    | 0.10050 | 2.4 | 0.87212  | 3.6 | 0.06294 | 2.8 | 0.65 | 617  | 14 | 637  | 17 | 706  | 59  | 87         | 91  | 51  | 0.56 | 6  | 2 | S08     |
| D30-seq2-b04 | 063  | 14621  | 115  | 13  | 0.26 | 4198   | 0.10871 | 2.1 | 0.91751  | 2.5 | 0.06121 | 1.4 | 0.82 | 665  | 13 | 661  | 12 | 647  | 31  | <b>103</b> | 117 | 50  | 0.43 | 4  | 1 | S22     |
| D30-seq2-b05 | 064  | 93977  | 102  | 43  | 0.46 | 77070  | 0.35546 | 2.0 | 6.08816  | 2.3 | 0.12422 | 1.1 | 0.87 | 1961 | 34 | 1989 | 21 | 2018 | 20  | <b>97</b>  | 144 | 65  | 0.45 | 8  | 2 | x       |
| D30-seq2-b06 | 065  | 37366  | 301  | 38  | 0.67 | 27200  | 0.10328 | 2.0 | 0.86301  | 2.3 | 0.06060 | 1.1 | 0.88 | 634  | 12 | 632  | 11 | 625  | 23  | <b>101</b> | 129 | 96  | 0.74 | 8  | 2 | x       |
| D30-seq2-b07 | 066  | 130801 | 153  | 68  | 0.66 | 11113  | 0.34618 | 2.0 | 5.86615  | 2.2 | 0.12290 | 0.9 | 0.92 | 1916 | 34 | 1956 | 19 | 1999 | 16  | <b>96</b>  | 134 | 74  | 0.56 | 9  | 2 | x       |
| D30-seq2-b08 | 067  | 53439  | 488  | 47  | 0.19 | 38045  | 0.09431 | 2.0 | 0.77414  | 2.2 | 0.05953 | 0.9 | 0.91 | 581  | 11 | 582  | 10 | 587  | 20  | <b>99</b>  | 123 | 82  | 0.66 | 7  | 2 | S03     |
| D30-seq2-b09 | 068  | 15785  | 144  | 15  | 0.28 | 7302   | 0.10254 | 3.4 | 0.86092  | 4.4 | 0.06089 | 2.8 | 0.77 | 629  | 20 | 631  | 21 | 635  | 60  | <b>99</b>  | 124 | 61  | 0.49 | 5  | 2 | x       |
| D30-seq2-b10 | 069  | 40260  | 369  | 38  | 0.22 | 69734  | 0.10105 | 2.0 | 0.81944  | 2.4 | 0.05881 | 1.3 | 0.82 | 621  | 12 | 608  | 11 | 560  | 29  | 111        | 166 | 66  | 0.40 | 8  | 2 | x       |
| D30-seq2-b11 | 070  | 207155 | 176  | 85  | 0.32 | 5053   | 0.43173 | 1.8 | 9.20319  | 2.0 | 0.15460 | 0.8 | 0.92 | 2314 | 35 | 2358 | 18 | 2397 | 13  | <b>96</b>  | 155 | 83  | 0.54 | 8  | 2 | x       |
| D30-seq2-b12 | 071  | 17115  | 164  | 21  | 0.89 | 10726  | 0.09799 | 2.1 | 0.81753  | 2.6 | 0.06051 | 1.6 | 0.78 | 603  | 12 | 607  | 12 | 622  | 35  | <b>97</b>  | 121 | 63  | 0.52 | 7  | 2 | S24     |
| D30-seq2-b13 | 072  | 21910  | 179  | 21  | 0.37 | 7360   | 0.11199 | 2.0 | 0.96344  | 2.5 | 0.06239 | 1.5 | 0.79 | 684  | 13 | 685  | 13 | 688  | 33  | <b>100</b> | 162 | 44  | 0.27 | 7  | 2 | x       |
| D30-seq2-b14 | 073  | 15214  | 132  | 16  | 0.62 | 1247   | 0.10354 | 2.4 | 0.80185  | 3.8 | 0.05617 | 2.9 | 0.63 | 635  | 14 | 598  | 17 | 459  | 65  | 138        | 149 | 77  | 0.52 | 6  | 2 | S12     |
| D30-seq2-b15 | 074  | 10608  | 97   | 10  | 0.34 | 1585   | 0.08916 | 2.2 | 0.89241  | 4.5 | 0.07259 | 4.0 | 0.49 | 551  | 12 | 648  | 22 | 1003 | 80  | 55         | 140 | 77  | 0.55 | 7  | 2 | x       |
| D30-seq2-b16 | 075  | 128592 | 92   | 46  | 0.13 | 24518  | 0.46645 | 2.7 | 10.34454 | 3.1 | 0.16084 | 1.4 | 0.89 | 2468 | 56 | 2466 | 29 | 2465 | 23  | <b>100</b> | 129 | 60  | 0.47 | 8  | 2 | x       |
| D30-seq2-b17 | 076  | 86572  | 123  | 44  | 0.31 | 14142  | 0.31910 | 2.2 | 4.92789  | 2.5 | 0.11200 | 1.0 | 0.91 | 1785 | 35 | 1807 | 21 | 1832 | 19  | <b>97</b>  | 120 | 58  | 0.48 | 7  | 2 | S23     |
| D30-seq2-b18 | 077  | 15417  | 129  | 16  | 0.36 | 7210   | 0.11063 | 2.0 | 0.94824  | 3.3 | 0.06216 | 2.7 | 0.59 | 676  | 13 | 677  | 17 | 680  | 57  | <b>100</b> | 132 | 81  | 0.61 | 7  | 2 | S25     |
| D30-seq2-b19 | 078  | 206205 | 151  | 89  | 0.78 | 132202 | 0.43995 | 2.0 | 9.63428  | 2.3 | 0.15882 | 1.1 | 0.88 | 2350 | 39 | 2400 | 21 | 2443 | 18  | <b>96</b>  | 123 | 63  | 0.51 | 7  | 1 | S08     |
| D30-seq2-b20 | 079  | 11612  | 104  | 12  | 0.44 | 20157  | 0.10332 | 2.2 | 0.83666  | 2.8 | 0.05873 | 1.8 | 0.77 | 634  | 13 | 617  | 13 | 557  | 40  | 114        | 163 | 59  | 0.36 | 8  | 3 | x       |
| D30-seq2-b21 | 080  | 35507  | 258  | 30  | 0.33 | 1446   | 0.10927 | 2.2 | 0.94502  | 3.1 | 0.06273 | 2.2 | 0.70 | 668  | 14 | 676  | 15 | 699  | 48  | <b>96</b>  | 189 | 79  | 0.42 | 10 | 3 | x       |
| D30-seq2-b22 | 081r | 30291  | 515  | 54  | 0.29 | 51005  | 0.10078 | 2.2 | 0.83998  | 2.4 | 0.06045 | 0.9 | 0.92 | 619  | 13 | 619  | 11 | 620  | 19  | <b>100</b> | 104 | 64  | 0.62 | 7  | 2 | S23     |
| D30-seq2-b23 | 081c | 12482  | 195  | 25  | 0.57 | 20705  | 0.10863 | 2.4 | 0.92230  | 2.9 | 0.06158 | 1.7 | 0.80 | 665  | 15 | 664  | 14 | 659  | 37  | <b>101</b> |     |     |      |    |   |         |
| D30-seq2-b24 | 082  | 166107 | 175  | 73  | 0.22 | 123283 | 0.38387 | 2.0 | 7.25609  | 2.3 | 0.13710 | 1.0 | 0.89 | 2094 | 36 | 2143 | 20 | 2191 | 18  | <b>96</b>  | 165 | 74  | 0.45 | 8  | 2 | x       |
| D30-seq2-b25 | 083  | 88423  | 62   | 34  | 0.41 | 31302  | 0.45660 | 2.2 | 10.52690 | 2.4 | 0.16721 | 1.0 | 0.91 | 2425 | 44 | 2482 | 22 | 2530 | 16  | <b>96</b>  | 128 | 79  | 0.62 | 7  | 1 | S12     |
| D30-seq2-b26 | 084  | 35161  | 328  | 33  | 0.15 | 7555   | 0.10369 | 2.8 | 0.87753  | 3.5 | 0.06138 | 2.2 | 0.78 | 636  | 17 | 640  | 17 | 653  | 47  | <b>97</b>  | 175 | 58  | 0.33 | 9  | 4 | x       |
| D30-seq2-b27 | 085  | 7707   | 70   | 9   | 0.51 | 13252  | 0.10892 | 2.3 | 0.93819  | 4.5 | 0.06247 | 3.9 | 0.52 | 666  | 15 | 672  | 23 | 690  | 83  | <b>97</b>  | 91  | 66  | 0.72 | 5  | 1 | S13     |
| D30-seq2-b28 | 086  | 151096 | 180  | 77  | 0.44 | 61784  | 0.36207 | 2.4 | 6.07426  | 2.7 | 0.12167 | 1.2 | 0.89 | 1992 | 41 | 1987 | 24 | 1981 | 22  | <b>101</b> | 96  | 57  | 0.59 | 8  | 1 | x       |
| D30-seq2-b29 | 087  | 10258  | 88   | 8   | 0.49 | 1149   | 0.08437 | 2.0 | 0.69509  | 5.5 | 0.05975 | 5.1 | 0.37 | 522  | 10 | 536  | 23 | 595  | 110 | 88         | 111 | 66  | 0.59 | 7  | 2 | S20     |
| D30-seq2-b30 | 088  | 15505  | 145  | 15  | 0.24 | 1684   | 0.10265 | 3.7 | 0.97799  | 4.8 | 0.06910 | 3.0 | 0.78 | 630  | 22 | 693  | 24 | 902  | 61  | 70         | 98  | 56  | 0.57 | 6  | 1 | S23     |
| D30-seq2-b31 | 089  | 9982   | 78   | 9   | 0.42 | 1139   | 0.10297 | 2.4 | 0.86379  | 6.0 | 0.06084 | 5.5 | 0.40 | 632  | 14 | 632  | 28 | 634  | 118 | <b>100</b> | 128 | 89  | 0.70 | 7  | 3 | S25/S23 |
| D30-seq2-b32 | 090  | 24583  | 214  | 24  | 0.44 | 1016   | 0.10272 | 2.4 | 0.85888  | 3.7 | 0.06064 | 2.8 | 0.65 | 630  | 15 | 630  | 18 | 627  | 61  | <b>101</b> | 133 | 44  | 0.33 | 8  | 2 | x       |
| D30-seq2-b33 | 091  | 11339  | 99   | 13  | 0.65 | 3465   | 0.10660 | 2.4 | 0.94889  | 4.4 | 0.06456 | 3.7 | 0.55 | 653  | 15 | 678  | 22 | 760  | 78  | 86         | 129 | 68  | 0.52 | 9  | 1 | x       |
| D30-seq2-b34 | 092  | 363803 | 169  | 117 | 0.35 | 161454 | 0.58285 | 2.9 | 18.44920 | 3.8 | 0.22957 | 2.4 | 0.77 | 2960 | 69 | 3013 | 37 | 3049 | 38  | <b>97</b>  | 152 | 79  | 0.52 | 10 | 2 | x       |
| D30-seq2-b35 | 093  | 18072  | 156  | 20  | 0.68 | 29638  | 0.10575 | 2.0 | 0.90501  | 2.5 | 0.06207 | 1.5 | 0.80 | 648  | 12 | 654  | 12 | 676  | 32  | <b>96</b>  | 154 | 64  | 0.42 | 9  | 1 | x       |
| D30-seq2-b36 | 094  | 7253   | 59   | 7   | 0.45 | 5062   | 0.11183 | 2.3 | 0.96239  | 3.2 | 0.06242 | 2.1 | 0.74 | 683  | 15 | 685  | 16 | 688  | 46  | <b>99</b>  | 134 | 61  | 0.46 | 6  | 1 | S12     |
| D30-seq2-b37 | 095  | 19710  | 196  | 21  | 0.40 | 1136   | 0.09745 | 2.0 | 0.81717  | 2.8 | 0.06082 | 1.9 | 0.73 | 599  | 12 | 606  | 13 | 633  | 41  | <b>95</b>  | 161 | 109 | 0.67 | 6  | 2 | S24     |
| D30-seq2-b38 | 096  | 47721  | 248  | 36  | 0.43 | 327    | 0.12413 | 2.5 | 1.09952  | 3.5 | 0.06424 | 2.4 | 0.72 | 754  | 18 | 753  | 19 | 750  | 51  | <b>101</b> | 146 | 78  | 0.54 | 6  | 2 | S25     |
| D30-seq2-b39 | 097  | 7002   | 61   | 8   | 0.62 | 11075  | 0.10277 | 2.1 | 0.86645  | 2.9 | 0.06115 | 2.1 | 0.71 | 631  | 13 | 634  | 14 | 644  | 44  | <b>98</b>  | 124 | 55  | 0.44 | 7  | 2 | S25     |
| D30-seq2-b40 | 098  | 31857  | 308  | 31  | 0.24 | 10071  | 0.09802 | 1.9 | 0.81823  | 2.7 | 0.06054 | 1.9 | 0.71 | 603  | 11 | 607  | 12 | 623  | 40  | <b>97</b>  | 178 | 52  | 0.29 | 6  | 2 | S25     |
| D30-seq2-b41 | 099  | 34475  | 3    |     |      |        |         |     |          |     |         |     |      |      |    |      |    |      |     |            |     |     |      |    |   |         |

|                                                                                                                  |      |        |     |     |      |        |         |     |          |     |         |     |      |      |    |      |    |      |     |     |     |    |      |    |   |         |  |
|------------------------------------------------------------------------------------------------------------------|------|--------|-----|-----|------|--------|---------|-----|----------|-----|---------|-----|------|------|----|------|----|------|-----|-----|-----|----|------|----|---|---------|--|
| D30-seq2-b45                                                                                                     | 103  | 6117   | 58  | 7   | 0.52 | 10690  | 0.10312 | 2.2 | 0.82870  | 3.2 | 0.05828 | 2.3 | 0.69 | 633  | 13 | 613  | 15 | 540  | 51  | 117 | 189 | 89 | 0.47 | 7  | 3 | S24     |  |
| D30-seq2-b46                                                                                                     | 104  | 5949   | 50  | 7   | 0.58 | 9664   | 0.11181 | 2.3 | 0.96551  | 3.0 | 0.06263 | 2.0 | 0.74 | 683  | 15 | 686  | 15 | 696  | 43  | 98  | 153 | 85 | 0.55 | 7  | 2 | x       |  |
| D30-seq2-b47                                                                                                     | 105  | 32615  | 307 | 32  | 0.29 | 9587   | 0.09924 | 2.2 | 0.83704  | 2.4 | 0.06118 | 1.1 | 0.88 | 610  | 13 | 618  | 11 | 645  | 24  | 95  | 129 | 65 | 0.50 | 6  | 2 | x       |  |
| D30-seq2-b48                                                                                                     | 106  | 43787  | 293 | 35  | 0.39 | 579    | 0.10587 | 2.5 | 0.86741  | 3.2 | 0.05942 | 2.0 | 0.78 | 649  | 15 | 634  | 15 | 583  | 43  | 111 | 105 | 68 | 0.64 | 7  | 2 | x       |  |
| D30-seq2-b49                                                                                                     | 107  | 53305  | 577 | 56  | 0.40 | 5031   | 0.08744 | 2.0 | 0.73898  | 2.2 | 0.06129 | 0.9 | 0.91 | 540  | 10 | 562  | 10 | 650  | 20  | 83  | 95  | 63 | 0.67 | 7  | 1 | D       |  |
| D30-seq2-b50                                                                                                     | 108  | 25423  | 39  | 16  | 0.60 | 4880   | 0.32807 | 2.4 | 5.16105  | 2.7 | 0.11410 | 1.2 | 0.90 | 1829 | 39 | 1846 | 23 | 1866 | 21  | 98  | 93  | 76 | 0.81 | 7  | 2 | S24     |  |
| D30-seq2-b51                                                                                                     | 109  | 23315  | 224 | 26  | 0.56 | 39020  | 0.10107 | 2.3 | 0.84770  | 2.9 | 0.06083 | 1.6 | 0.82 | 621  | 14 | 623  | 13 | 633  | 35  | 98  | 110 | 63 | 0.58 | 6  | 1 | S09     |  |
| D30-seq2-b52                                                                                                     | 110  | 23904  | 248 | 31  | 0.59 | 2905   | 0.10790 | 2.2 | 0.91313  | 2.8 | 0.06138 | 1.8 | 0.76 | 661  | 14 | 659  | 14 | 653  | 39  | 101 | 162 | 81 | 0.50 | 8  | 3 | x       |  |
| D30-seq2-b53                                                                                                     | 111  | 8494   | 85  | 11  | 0.73 | 6152   | 0.10198 | 2.1 | 0.82490  | 2.9 | 0.05867 | 1.9 | 0.74 | 626  | 13 | 611  | 13 | 555  | 42  | 113 | 148 | 72 | 0.49 | 8  | 2 | x       |  |
| D30-seq2-b54                                                                                                     | 112  | 21733  | 210 | 23  | 0.41 | 14168  | 0.10072 | 2.4 | 0.84624  | 2.7 | 0.06093 | 1.3 | 0.88 | 619  | 14 | 623  | 13 | 637  | 28  | 97  | 138 | 66 | 0.48 | 7  | 2 | x       |  |
| D30-seq2-b55                                                                                                     | 113  | 42483  | 443 | 54  | 0.67 | 1234   | 0.10076 | 2.2 | 0.83431  | 2.4 | 0.06005 | 0.9 | 0.92 | 619  | 13 | 616  | 11 | 605  | 20  | 102 | 161 | 87 | 0.54 | 5  | 2 | S08     |  |
| D30-seq2-b56                                                                                                     | 114  | 189645 | 77  | 59  | 0.42 | 37530  | 0.62166 | 2.3 | 20.69214 | 2.4 | 0.24141 | 0.7 | 0.95 | 3117 | 58 | 3124 | 24 | 3129 | 12  | 100 | 150 | 64 | 0.43 | 8  | 1 | x       |  |
| D30-seq2-b57                                                                                                     | 114B | 28696  | 283 | 29  | 0.30 | 5013   | 0.09739 | 2.1 | 0.80520  | 2.9 | 0.05997 | 2.1 | 0.71 | 599  | 12 | 600  | 13 | 602  | 45  | 99  | 132 | 57 | 0.43 | 7  | 2 | S25     |  |
| D30-seq2-b58                                                                                                     | 115  | 9792   | 91  | 10  | 0.24 | 16649  | 0.11199 | 2.0 | 0.96970  | 3.8 | 0.06280 | 3.2 | 0.53 | 684  | 13 | 688  | 19 | 701  | 68  | 98  | 140 | 83 | 0.59 | 8  | 1 | x       |  |
| D30-seq2-b59                                                                                                     | 116  | 167619 | 246 | 91  | 0.46 | 21648  | 0.31079 | 5.0 | 5.61351  | 5.2 | 0.13100 | 1.3 | 0.97 | 1745 | 78 | 1918 | 46 | 2111 | 22  | 83  | 148 | 79 | 0.54 | 8  | 2 | x       |  |
| D30-seq2-b60                                                                                                     | 117  | 29880  | 303 | 30  | 0.34 | 3666   | 0.09431 | 2.0 | 0.87252  | 3.9 | 0.06710 | 3.3 | 0.52 | 581  | 11 | 637  | 18 | 841  | 69  | 69  | 90  | 47 | 0.52 | 6  | 1 | S24     |  |
| D30-seq3-c01                                                                                                     | 118  | 39173  | 431 | 45  | 0.31 | 39894  | 0.09863 | 1.9 | 0.82608  | 2.3 | 0.06074 | 1.3 | 0.83 | 606  | 11 | 611  | 11 | 630  | 28  | 96  | 160 | 68 | 0.42 | 7  | 3 | x       |  |
| D30-seq3-c02                                                                                                     | 119  | 10390  | 85  | 11  | 0.62 | 780    | 0.10421 | 2.1 | 0.84569  | 7.0 | 0.05886 | 6.7 | 0.30 | 639  | 13 | 622  | 33 | 562  | 146 | 114 | 172 | 97 | 0.56 | 6  | 2 | S25     |  |
| D30-seq3-c03                                                                                                     | 120  | 16076  | 180 | 21  | 0.38 | 2117   | 0.10624 | 2.1 | 0.96758  | 3.3 | 0.06606 | 2.5 | 0.64 | 651  | 13 | 687  | 17 | 808  | 53  | 81  | 113 | 42 | 0.37 | 6  | 1 | S24     |  |
| D30-seq3-c04                                                                                                     | 121  | 29864  | 306 | 36  | 0.56 | 32052  | 0.09846 | 1.3 | 0.82421  | 1.8 | 0.06071 | 1.3 | 0.70 | 605  | 7  | 610  | 8  | 629  | 28  | 96  | 123 | 71 | 0.58 | 6  | 2 | S24/S25 |  |
| D30-seq3-c05                                                                                                     | 122  | 17775  | 160 | 22  | 0.53 | 12158  | 0.11993 | 2.0 | 1.05988  | 2.8 | 0.06410 | 2.0 | 0.71 | 730  | 14 | 734  | 15 | 745  | 41  | 98  | 143 | 60 | 0.42 | 8  | 2 | x       |  |
| D30-seq3-c06                                                                                                     | 123  | 15927  | 152 | 20  | 0.58 | 1992   | 0.10959 | 1.4 | 0.93368  | 3.4 | 0.06179 | 3.1 | 0.40 | 670  | 9  | 670  | 17 | 667  | 67  | 101 | 120 | 62 | 0.52 | 6  | 2 | S24     |  |
| D30-seq3-c07                                                                                                     | 124  | 12556  | 128 | 15  | 0.37 | 10359  | 0.10553 | 1.6 | 0.88769  | 2.1 | 0.06101 | 1.3 | 0.76 | 647  | 10 | 645  | 10 | 639  | 29  | 101 | 160 | 92 | 0.57 | 8  | 2 | x       |  |
| D30-seq3-c08                                                                                                     | 125  | 295809 | 442 | 171 | 0.22 | 27413  | 0.36489 | 1.4 | 6.27098  | 1.5 | 0.12464 | 0.5 | 0.95 | 2005 | 24 | 2014 | 13 | 2024 | 8   | 99  | 110 | 65 | 0.59 | 10 | 2 | x       |  |
| D30-seq3-c09                                                                                                     | 126  | 12598  | 131 | 15  | 0.44 | 6274   | 0.09844 | 1.4 | 0.84562  | 2.8 | 0.06230 | 2.4 | 0.52 | 605  | 8  | 622  | 13 | 684  | 50  | 88  | 132 | 72 | 0.55 | 7  | 2 | S19     |  |
| D30-seq3-c10                                                                                                     | 127  | 11798  | 130 | 12  | 0.41 | 1912   | 0.08533 | 1.8 | 0.77043  | 2.8 | 0.06548 | 2.1 | 0.65 | 528  | 9  | 580  | 12 | 790  | 45  | 67  | 100 | 50 | 0.50 | 8  | 2 | x       |  |
| D30-seq3-c11                                                                                                     | 128  | 15735  | 168 | 21  | 0.60 | 26338  | 0.10381 | 2.0 | 0.87213  | 2.4 | 0.06093 | 1.3 | 0.83 | 637  | 12 | 637  | 11 | 637  | 29  | 100 | 115 | 70 | 0.61 | 6  | 2 | S18     |  |
| D30-seq3-c12                                                                                                     | 129  | 19816  | 200 | 22  | 0.66 | 6448   | 0.08571 | 1.7 | 0.76348  | 2.6 | 0.06460 | 1.9 | 0.68 | 530  | 9  | 576  | 11 | 761  | 40  | 70  | 91  | 54 | 0.60 | 5  | 1 | S20     |  |
| D30-seq3-c13                                                                                                     | 130  | 362894 | 365 | 178 | 0.24 | 37093  | 0.44238 | 1.5 | 9.55006  | 1.8 | 0.15657 | 1.0 | 0.84 | 2361 | 30 | 2392 | 17 | 2419 | 17  | 98  | 107 | 58 | 0.54 | 9  | 2 | x       |  |
| D30-seq3-c14                                                                                                     | 131  | 72268  | 60  | 29  | 0.52 | 43452  | 0.41130 | 1.4 | 9.63130  | 1.6 | 0.16983 | 0.8 | 0.86 | 2221 | 27 | 2400 | 15 | 2556 | 14  | 87  | 116 | 73 | 0.63 | 5  | 2 | S19     |  |
| D30-seq3-c15                                                                                                     | 132  | 82182  | 153 | 54  | 0.33 | 596    | 0.32042 | 2.1 | 4.78995  | 2.6 | 0.10842 | 1.5 | 0.82 | 1792 | 33 | 1783 | 22 | 1773 | 27  | 101 | 130 | 64 | 0.49 | 5  | 2 | S24     |  |
| D30-seq3-c16                                                                                                     | 133  | 46797  | 617 | 52  | 0.42 | 1173   | 0.07606 | 1.6 | 0.62732  | 2.3 | 0.05982 | 1.6 | 0.72 | 473  | 8  | 494  | 9  | 597  | 34  | 79  | 150 | 71 | 0.47 | 8  | 3 | x       |  |
| D30-seq3-c17                                                                                                     | 134  | 11196  | 120 | 14  | 0.27 | 19205  | 0.11271 | 1.6 | 0.97525  | 4.1 | 0.06275 | 3.7 | 0.38 | 688  | 10 | 691  | 21 | 700  | 80  | 98  | 151 | 70 | 0.46 | 9  | 3 | x       |  |
| D30-seq3-c18                                                                                                     | 135  | 59619  | 258 | 44  | 0.10 | 64997  | 0.16773 | 1.9 | 2.10262  | 2.1 | 0.09092 | 0.9 | 0.90 | 1000 | 17 | 1150 | 14 | 1445 | 18  | 69  | 152 | 97 | 0.64 | 7  | 2 | S13     |  |
| D30-seq3-c19                                                                                                     | 136  | 22461  | 34  | 12  | 0.74 | 226    | 0.26252 | 2.3 | 3.92285  | 5.0 | 0.10838 | 4.4 | 0.47 | 1503 | 31 | 1618 | 41 | 1772 | 80  | 85  | 139 | 59 | 0.42 | 8  | 2 | x       |  |
| D30-seq3-c20                                                                                                     | 137  | 216841 | 371 | 133 | 0.15 | 183307 | 0.34634 | 1.5 | 5.77188  | 1.7 | 0.12087 | 0.9 | 0.87 | 1917 | 25 | 1942 | 15 | 1969 | 15  | 97  | 142 | 57 | 0.40 | 7  | 2 | S24     |  |
| D30-seq3-c21                                                                                                     | 138  | 54321  | 85  | 40  | 0.78 | 15386  | 0.35101 | 1.4 | 6.01401  | 1.8 | 0.12426 | 1.1 | 0.77 | 1939 | 23 | 1978 | 16 | 2018 | 20  | 96  | 111 | 58 | 0.53 | 8  | 2 | x       |  |
| D30-seq3-c22                                                                                                     | 139  | 6189   | 63  | 7   | 0.28 | 1385   | 0.11070 | 2.0 | 0.94639  | 2.7 | 0.06200 | 1.7 | 0.76 | 677  | 13 | 676  | 13 | 674  | 37  | 100 | 133 | 63 | 0.47 | 8  | 3 | x       |  |
| D30-seq3-c23                                                                                                     | 140  | 2248   | 24  | 3   | 0.45 | 1316   | 0.11371 | 2.0 | 0.98348  | 4.6 | 0.06273 | 4.1 | 0.44 | 694  | 13 | 695  | 23 | 699  | 87  | 99  | 143 | 75 | 0.52 | 8  | 2 | x       |  |
| D30-seq3-c24                                                                                                     | 141  | 278101 | 182 | 110 | 0.10 | 60511  | 0.56184 | 1.5 | 16.67981 | 1.6 | 0.21532 | 0.5 | 0.94 | 2874 | 34 | 2917 | 15 | 2946 | 9   | 98  | 112 | 64 | 0.57 | 9  | 1 | x       |  |
| D30-seq3-c25                                                                                                     | 142  | 54869  | 84  | 38  | 0.55 | 45283  | 0.37276 | 1.5 | 6.36458  | 1.7 | 0.12383 | 1.0 | 0.83 | 2042 | 26 | 2027 | 15 | 2012 | 17  | 101 | 144 | 80 | 0.56 | 8  | 2 | x       |  |
| D30-seq3-c26                                                                                                     | 143  | 12088  | 74  | 10  | 0.42 | 272    | 0.10183 | 2.1 | 1.65536  | 7.5 | 0.11790 | 7.2 | 0.28 | 625  | 12 | 992  | 48 | 1925 | 128 | 32  | 113 | 61 | 0.54 | 7  | 1 | x       |  |
| D30-seq3-c27                                                                                                     | 144  | 45129  | 95  | 28  | 0.35 | 23167  | 0.25246 | 2.2 | 3.94392  | 2.6 | 0.11330 | 1.4 | 0.83 | 1451 | 28 | 1623 | 21 | 1853 | 26  | 78  | 133 | 66 | 0.50 | 6  | 2 | S12     |  |
| D30-seq3-c28                                                                                                     | 145  | 22503  | 267 | 28  | 0.25 | 33959  | 0.09988 | 1.4 | 0.83412  | 1.8 | 0.06057 | 1.2 | 0.76 | 614  | 8  | 616  | 9  | 624  | 26  | 98  | 129 | 65 | 0.50 | 7  | 2 | S20/S18 |  |
| D30-seq3-c29                                                                                                     | 146  | 21131  | 248 | 33  | 0.73 | 35681  | 0.10693 | 1.4 | 0.91002  | 3.1 | 0.06172 | 2.8 | 0.44 | 655  | 9  | 657  | 15 | 665  | 59  | 99  | 102 | 60 | 0.58 | 6  | 1 | S07     |  |
| <b>D43, mylonite, n = 2/6, 90-110% conc., Sebkhya Gezmayet unit, N22°36'27.66", W15°34'06.60"</b>                |      |        |     |     |      |        |         |     |          |     |         |     |      |      |    |      |    |      |     |     |     |    |      |    |   |         |  |
| D43-seq1-a01                                                                                                     | 001  | 254380 | 329 | 107 | 0.64 | 1055   | 0.24869 | 1.9 | 4.25574  | 2.0 | 0.12411 | 0.8 | 0.92 | 1432 | 24 | 1685 | 17 | 2016 | 14  | 71  | 88  | 48 | 0.55 | 6  | 2 | S23     |  |
| D43-seq1-a02                                                                                                     | 002  | 38281  | 196 | 32  | 0.67 | 31294  | 0.15313 | 1.4 | 1.46804  | 1.8 | 0.06953 | 1.1 | 0.79 | 918  | 12 | 917  | 11 | 915  | 22  | 100 | 116 | 51 | 0.44 | 8  | 3 | x       |  |
| D43-seq1-a03                                                                                                     | 003  | 146456 | 157 | 55  | 1.09 | 360    | 0.27836 | 1.6 | 4.88464  | 1.9 | 0.12727 | 1.0 | 0.84 | 1583 | 23 | 1800 | 16 | 2061 | 18  | 77  | 70  | 55 | 0.78 | 7  | 2 | x       |  |
| D43-seq1-a04                                                                                                     | 004  | 63344  | 79  | 28  | 1.00 | 2027   | 0.30789 | 1.7 | 5.64062  | 2.4 | 0.13287 | 1.7 | 0.71 | 1730 | 25 | 1922 | 21 | 2136 | 29  | 81  | 78  | 48 | 0.61 | 7  | 3 | S24     |  |
| D43-seq1-a05                                                                                                     | 005  | 21000  | 202 | 19  | 0.42 | 11138  | 0.09580 | 1.5 | 0.78743  | 3.1 | 0.05961 | 2.7 | 0.48 | 590  | 8  | 590  | 14 | 590  | 58  | 100 | 81  | 69 | 0.85 | 8  | 2 | x       |  |
| D43-seq1-a06                                                                                                     | 006  | 238601 | 369 | 102 | 0.38 | 5395   | 0.25433 | 2.5 | 4.40959  | 2.6 | 0.12575 | 0.5 | 0.98 | 1461 | 33 | 1714 | 22 | 2039 | 9   | 72  | 87  | 54 | 0.61 | 6  | 3 | S24     |  |
| <b>D66, quartzitic sandstone, n = 62/114, 90-110% conc., Sebkhya Gezmayet unit, N22°38'30.72", W15°25'46.92"</b> |      |        |     |     |      |        |         |     |          |     |         |     |      |      |    |      |    |      |     |     |     |    |      |    |   |         |  |
| D66-seq1-a01                                                                                                     | 001  | 48402  | 906 | 98  | 0.18 | 5599   | 0.04673 | 1.7 | 0.34365  | 2.2 | 0.05333 | 1.4 | 0.76 | 294  | 5  | 300  | 6  | 343  | 32  | 86  | 81  | 59 | 0.72 | 7  | 1 | x       |  |
| D66-seq1-a02                                                                                                     | 002  | 64693  | 506 | 54  | 0.29 | 3270   | 0.      |     |          |     |         |     |      |      |    |      |    |      |     |     |     |    |      |    |   |         |  |

|              |     |        |      |     |      |        |         |      |         |      |         |      |      |     |     |      |     |      |     |            |     |    |      |   |   |     |
|--------------|-----|--------|------|-----|------|--------|---------|------|---------|------|---------|------|------|-----|-----|------|-----|------|-----|------------|-----|----|------|---|---|-----|
| D66-seq1-a04 | 004 | 56815  | 518  | 49  | 0.38 | 4466   | 0.08816 | 1.7  | 0.70884 | 1.9  | 0.05831 | 0.8  | 0.89 | 545 | 9   | 544  | 8   | 542  | 18  | <b>101</b> | 60  | 40 | 0.66 | 6 | 2 | x   |
| D66-seq1-a05 | 005 | 83430  | 707  | 68  | 0.21 | 2623   | 0.08877 | 1.8  | 0.71551 | 2.1  | 0.05846 | 1.1  | 0.85 | 548 | 9   | 548  | 9   | 547  | 24  | <b>100</b> | 107 | 67 | 0.63 | 5 | 2 | S20 |
| D66-seq1-a06 | 006 | 92443  | 865  | 84  | 0.08 | 5152   | 0.08738 | 2.1  | 0.70301 | 2.3  | 0.05835 | 0.9  | 0.93 | 540 | 11  | 541  | 10  | 543  | 19  | <b>99</b>  | 73  | 58 | 0.79 | 5 | 2 | S05 |
| D66-seq1-a07 | 007 | 78835  | 687  | 68  | 0.09 | 4477   | 0.08740 | 1.6  | 0.70262 | 1.9  | 0.05831 | 1.0  | 0.86 | 540 | 8   | 540  | 8   | 541  | 21  | <b>100</b> | 75  | 43 | 0.58 | 6 | 2 | S18 |
| D66-seq1-a08 | 008 | 86841  | 750  | 67  | 0.18 | 23339  | 0.07847 | 1.7  | 0.62307 | 1.9  | 0.05759 | 0.7  | 0.93 | 487 | 8   | 492  | 7   | 514  | 15  | <b>95</b>  | 89  | 53 | 0.60 | 5 | 1 | P4  |
| D66-seq1-a09 | 009 | 56780  | 470  | 46  | 0.33 | 62700  | 0.08803 | 1.7  | 0.71447 | 2.0  | 0.05887 | 1.1  | 0.84 | 544 | 9   | 547  | 9   | 562  | 24  | <b>97</b>  | 51  | 29 | 0.57 | 6 | 2 | S05 |
| D66-seq1-a10 | 010 | 26143  | 481  | 50  | 0.32 | 2527   | 0.04492 | 1.8  | 0.35296 | 2.3  | 0.05698 | 1.4  | 0.80 | 283 | 5   | 307  | 6   | 491  | 30  | <b>58</b>  | 91  | 65 | 0.71 | 7 | 1 | x   |
| D66-seq1-a11 | 011 | 15917  | 283  | 40  | 0.54 | 4736   | 0.04330 | 2.0  | 0.35007 | 2.9  | 0.05864 | 2.2  | 0.68 | 273 | 5   | 305  | 8   | 554  | 47  | <b>49</b>  | 59  | 59 | 0.99 | 7 | 2 | x   |
| D66-seq1-a12 | 012 | 26815  | 415  | 67  | 0.40 | 2344   | 0.04619 | 2.5  | 0.33316 | 5.0  | 0.05231 | 4.3  | 0.51 | 291 | 7   | 292  | 13  | 299  | 98  | <b>97</b>  | 58  | 34 | 0.59 | 7 | 1 | x   |
| D66-seq1-a13 | 013 | 19873  | 389  | 45  | 0.39 | 4182   | 0.04047 | 1.8  | 0.30455 | 2.4  | 0.05457 | 1.7  | 0.73 | 256 | 4   | 270  | 6   | 395  | 37  | <b>65</b>  | 105 | 70 | 0.67 | 6 | 2 | S24 |
| D66-seq1-a14 | 014 | 28133  | 371  | 44  | 0.39 | 581    | 0.04769 | 1.8  | 0.35675 | 5.0  | 0.05426 | 4.7  | 0.36 | 300 | 5   | 310  | 13  | 382  | 105 | <b>79</b>  | 63  | 49 | 0.78 | 9 | 3 | x   |
| D66-seq1-a15 | 015 | 78092  | 768  | 69  | 0.10 | 9171   | 0.07574 | 2.0  | 0.60844 | 2.2  | 0.05827 | 0.8  | 0.93 | 471 | 9   | 483  | 8   | 540  | 17  | <b>87</b>  | 63  | 45 | 0.70 | 6 | 2 | S24 |
| D66-seq1-a16 | 016 | 137611 | 1343 | 138 | 0.07 | 94943  | 0.08885 | 1.8  | 0.68867 | 2.0  | 0.05621 | 0.9  | 0.88 | 549 | 9   | 532  | 8   | 461  | 21  | <b>119</b> | 73  | 44 | 0.60 | 5 | 2 | S03 |
| D66-seq1-a17 | 017 | 96551  | 909  | 84  | 0.07 | 32518  | 0.08028 | 2.2  | 0.65403 | 2.9  | 0.05909 | 1.8  | 0.78 | 498 | 11  | 511  | 12  | 570  | 39  | <b>87</b>  | 79  | 47 | 0.59 | 7 | 2 | S08 |
| D66-seq1-a18 | 018 | 97879  | 932  | 94  | 0.08 | 11254  | 0.09000 | 1.7  | 0.72739 | 2.0  | 0.05862 | 1.1  | 0.84 | 556 | 9   | 555  | 9   | 553  | 24  | <b>100</b> | 63  | 46 | 0.72 | 5 | 2 | S08 |
| D66-seq1-a19 | 019 | 70233  | 643  | 66  | 0.25 | 98798  | 0.09132 | 1.7  | 0.74054 | 2.0  | 0.05882 | 1.0  | 0.86 | 563 | 9   | 563  | 9   | 560  | 22  | <b>101</b> | 80  | 50 | 0.63 | 5 | 1 | S09 |
| D66-seq1-a20 | 020 | 192474 | 2102 | 141 | 0.07 | 2863   | 0.05318 | 2.1  | 0.45247 | 2.9  | 0.06170 | 2.0  | 0.72 | 334 | 7   | 379  | 9   | 664  | 43  | <b>50</b>  | 109 | 52 | 0.48 | 7 | 1 | S23 |
| D66-seq1-a21 | 021 | 3858   | 47   | 5   | 1.00 | 3090   | 0.08928 | 4.8  | 0.75395 | 7.7  | 0.06125 | 6.0  | 0.63 | 551 | 26  | 571  | 34  | 648  | 128 | <b>85</b>  | 47  | 28 | 0.60 | 8 | 1 | x   |
| D66-seq1-a22 | 022 | 38008  | 703  | 44  | 0.29 | 3727   | 0.06032 | 2.1  | 0.46314 | 2.8  | 0.05568 | 1.8  | 0.75 | 378 | 8   | 386  | 9   | 440  | 41  | <b>86</b>  | 91  | 52 | 0.57 | 8 | 2 | x   |
| D66-seq1-a23 | 023 | 24240  | 89   | 15  | 0.61 | 5410   | 0.12247 | 34.0 | 1.96577 | 46.0 | 0.11641 | 30.9 | 0.74 | 745 | 244 | 1104 | 369 | 1902 | 555 | <b>39</b>  | 67  | 32 | 0.47 | 7 | 2 | J3  |
| D66-seq1-a24 | 024 | -      | -    | -   | -    | -      | -       | -    | -       | -    | -       | -    | -    | -   | -   | -    | -   | -    | -   | -          | 69  | 49 | 0.71 | 8 | 1 | x   |
| D66-seq1-a25 | 025 | 23353  | 325  | 42  | 0.44 | 556    | 0.04571 | 1.8  | 0.32815 | 5.7  | 0.05207 | 5.4  | 0.32 | 288 | 5   | 288  | 14  | 288  | 124 | <b>100</b> | 96  | 64 | 0.67 | 7 | 2 | x   |
| D66-seq1-a26 | 026 | 68157  | 528  | 55  | 0.41 | 1046   | 0.09109 | 1.7  | 0.74119 | 2.1  | 0.05901 | 1.3  | 0.79 | 562 | 9   | 563  | 9   | 568  | 28  | <b>99</b>  | 98  | 49 | 0.50 | 6 | 2 | S24 |
| D66-seq1-a27 | 027 | 27679  | 312  | 25  | 0.55 | 4302   | 0.07351 | 1.9  | 0.61511 | 2.7  | 0.06069 | 1.8  | 0.73 | 457 | 9   | 487  | 10  | 628  | 39  | <b>73</b>  | 76  | 31 | 0.40 | 5 | 2 | S02 |
| D66-seq1-a28 | 028 | 28686  | 396  | 38  | 0.18 | 8839   | 0.08433 | 1.6  | 0.68194 | 2.4  | 0.05865 | 1.8  | 0.68 | 522 | 8   | 528  | 10  | 554  | 38  | <b>94</b>  | 68  | 41 | 0.60 | 7 | 1 | S09 |
| D66-seq1-a29 | 029 | 114647 | 1046 | 104 | 0.09 | 1635   | 0.08521 | 1.7  | 0.67921 | 2.1  | 0.05781 | 1.3  | 0.81 | 527 | 9   | 526  | 9   | 523  | 28  | <b>101</b> | 80  | 54 | 0.67 | 7 | 3 | x   |
| D66-seq1-a30 | 030 | 5036   | 99   | 9   | 0.38 | 8452   | 0.04401 | 3.9  | 0.45052 | 10.4 | 0.07425 | 9.7  | 0.37 | 278 | 11  | 378  | 33  | 1048 | 195 | <b>26</b>  | 84  | 51 | 0.61 | 5 | 1 | x   |
| D66-seq1-a31 | 031 | 28948  | 434  | 77  | 0.45 | 671    | 0.04538 | 2.4  | 0.32554 | 5.0  | 0.05203 | 4.4  | 0.48 | 286 | 7   | 286  | 12  | 287  | 100 | <b>100</b> | 78  | 55 | 0.70 | 7 | 2 | x   |
| D66-seq1-a32 | 032 | 104423 | 1058 | 107 | 0.08 | 43805  | 0.08650 | 2.4  | 0.69296 | 2.9  | 0.05810 | 1.5  | 0.85 | 535 | 13  | 535  | 12  | 534  | 33  | <b>100</b> | 136 | 80 | 0.59 | 6 | 3 | S25 |
| D66-seq1-a33 | 033 | 78982  | 795  | 80  | 0.18 | 53092  | 0.08893 | 1.7  | 0.71371 | 2.0  | 0.05821 | 1.0  | 0.87 | 549 | 9   | 547  | 8   | 538  | 21  | <b>102</b> | 137 | 75 | 0.55 | 5 | 2 | J5  |
| D66-seq1-a34 | 034 | 345    | 5    | 0   | 0.88 | 644    | 0.07387 | 7.8  | 0.54654 | 33.8 | 0.05366 | 32.9 | 0.23 | 459 | 35  | 443  | 129 | 357  | 744 | <b>129</b> | 49  | 43 | 0.87 | 5 | 2 | x   |
| D66-seq1-a35 | 035 | 114413 | 1084 | 118 | 0.09 | 3251   | 0.09155 | 2.7  | 0.75740 | 3.4  | 0.06000 | 2.1  | 0.79 | 565 | 15  | 573  | 15  | 604  | 45  | <b>94</b>  | 95  | 60 | 0.63 | 5 | 3 | x   |
| D66-seq1-a36 | 036 | 5507   | 100  | 14  | 0.47 | 2494   | 0.05540 | 10.4 | 0.59455 | 20.2 | 0.07783 | 17.3 | 0.51 | 348 | 35  | 474  | 80  | 1143 | 344 | <b>30</b>  | 66  | 57 | 0.87 | 8 | 1 | x   |
| D66-seq1-a37 | 037 | 20197  | 173  | 17  | 0.24 | 3581   | 0.07885 | 10.8 | 0.64096 | 11.1 | 0.05895 | 2.6  | 0.97 | 489 | 51  | 503  | 45  | 565  | 57  | <b>87</b>  | 76  | 40 | 0.52 | 7 | 2 | S04 |
| D66-seq1-a38 | 038 | 81310  | 837  | 83  | 0.08 | 22288  | 0.08724 | 1.9  | 0.70074 | 2.0  | 0.05826 | 0.8  | 0.91 | 539 | 10  | 539  | 9   | 539  | 18  | <b>100</b> | 102 | 50 | 0.49 | 5 | 2 | S19 |
| D66-seq1-a39 | 039 | 97431  | 990  | 98  | 0.12 | 12305  | 0.08654 | 2.0  | 0.69428 | 2.4  | 0.05818 | 1.2  | 0.87 | 535 | 10  | 535  | 10  | 537  | 26  | <b>100</b> | 91  | 64 | 0.70 | 6 | 2 | S15 |
| D66-seq1-a40 | 040 | 15705  | 344  | 70  | 0.57 | 5117   | 0.04596 | 2.0  | 0.34543 | 2.7  | 0.05451 | 1.7  | 0.76 | 290 | 6   | 301  | 7   | 392  | 39  | <b>74</b>  | 88  | 79 | 0.89 | 7 | 2 | x   |
| D66-seq1-a41 | 041 | 7254   | 48   | 7   | 1.10 | 7577   | 0.11009 | 12.9 | 1.06856 | 22.5 | 0.07040 | 18.4 | 0.57 | 673 | 83  | 738  | 125 | 940  | 377 | <b>72</b>  | 54  | 24 | 0.44 | 5 | 1 | J3  |
| D66-seq1-a42 | 042 | 82550  | 768  | 78  | 0.11 | 2392   | 0.08728 | 1.8  | 0.70366 | 2.0  | 0.05847 | 0.8  | 0.92 | 539 | 10  | 541  | 8   | 548  | 17  | <b>99</b>  | 103 | 51 | 0.50 | 6 | 2 | S04 |
| D66-seq1-a43 | 043 | 88556  | 956  | 93  | 0.08 | 27556  | 0.08503 | 1.7  | 0.68580 | 2.0  | 0.05849 | 1.1  | 0.84 | 526 | 9   | 530  | 8   | 548  | 24  | <b>96</b>  | 110 | 60 | 0.54 | 4 | 2 | S20 |
| D66-seq1-a44 | 044 | 51368  | 481  | 46  | 0.68 | 5765   | 0.08197 | 2.1  | 0.68000 | 3.1  | 0.06017 | 2.3  | 0.67 | 508 | 10  | 527  | 13  | 610  | 50  | <b>83</b>  | 107 | 53 | 0.50 | 5 | 3 | x   |
| D66-seq1-a45 | 045 | 17343  | 166  | 7   | 0.68 | 919    | 0.02660 | 8.4  | 0.27258 | 9.4  | 0.07431 | 4.2  | 0.89 | 169 | 14  | 245  | 21  | 1050 | 85  | <b>16</b>  | 82  | 52 | 0.63 | 4 | 1 | S19 |
| D66-seq1-a46 | 046 | 76249  | 849  | 86  | 0.09 | 119828 | 0.09269 | 1.7  | 0.75528 | 2.0  | 0.05910 | 1.0  | 0.87 | 571 | 9   | 571  | 9   | 571  | 21  | <b>100</b> | 84  | 53 | 0.63 | 6 | 2 | S24 |
| D66-seq1-a47 | 047 | 19805  | 256  | 26  | 0.15 | 17584  | 0.09270 | 3.7  | 0.89396 | 9.0  | 0.06994 | 8.2  | 0.42 | 571 | 20  | 648  | 44  | 927  | 168 | <b>62</b>  | 69  | 44 | 0.64 | 6 | 1 | S04 |
| D66-seq1-a48 | 048 | 2009   | 39   | 5   | 7.14 | 3952   | 0.03966 | 5.2  | 0.28684 | 8.2  | 0.05246 | 6.3  | 0.63 | 251 | 13  | 256  | 19  | 306  | 144 | <b>82</b>  | 72  | 64 | 0.89 | 5 | 1 | S25 |
| D66-seq1-a49 | 049 | 96409  | 1110 | 103 | 0.08 | 5397   | 0.07899 | 2.3  | 0.66953 | 2.6  | 0.06147 | 1.2  | 0.89 | 490 | 11  | 520  | 11  | 656  | 26  | <b>75</b>  | 100 | 64 | 0.65 | 5 | 1 | S09 |
| D66-seq1-a50 | 050 | 2820   | 40   | 9   | 0.91 | 2169   | 0.04623 | 22.9 | 0.36324 | 39.5 | 0.05698 | 32.3 | 0.58 | 291 | 65  | 315  | 113 | 491  | 711 | <b>59</b>  | 55  | 40 | 0.73 | 8 | 3 | x   |
| D66-seq1-a51 | 051 | 73534  | 829  | 85  | 0.09 | 8635   | 0.08896 | 1.9  | 0.72129 | 2.1  | 0.05880 | 0.9  | 0.91 | 549 | 10  | 551  | 9   | 560  | 19  | <b>98</b>  | 89  | 47 | 0.53 | 6 | 2 | S24 |
| D66-seq1-a52 | 052 | 18193  | 282  | 46  | 0.66 | 567    | 0.03809 | 2.1  | 0.28803 | 8.6  | 0.05485 | 8.3  | 0.24 | 241 | 5   | 257  | 20  | 406  | 187 | <b>59</b>  | 77  | 49 | 0.64 | 7 | 2 | x   |
| D66-seq1-a53 | 053 | 38880  | 415  | 43  | 0.52 | 11235  | 0.08945 | 1.9  | 0.72915 | 2.6  | 0.05912 | 1.7  | 0.74 | 552 | 10  | 556  | 11  | 572  | 37  | <b>97</b>  | 66  | 31 | 0.46 | 6 | 2 | S25 |
| D66-seq1-a54 | 054 | 59202  | 688  | 68  | 0.24 | 103443 | 0.08685 | 1.8  | 0.69935 | 2.2  | 0.05840 | 1.2  | 0.84 | 537 | 10  | 538  | 9   | 545  | 26  | <b>99</b>  | 86  | 47 | 0.55 | 6 | 1 | S20 |
| D66-seq1-a55 | 055 | 59798  | 680  | 71  | 0.28 | 103343 | 0.09262 | 2.0  | 0.75280 | 2.3  | 0.05895 | 1.2  | 0.84 | 571 | 11  | 570  | 10  | 565  | 27  | <b>101</b> | 110 | 63 | 0.58 | 5 | 2 | S15 |
| D66-seq1-a56 | 056 | 671    | 10   | 1   | 0.95 | 1239   | 0.06872 | 10.5 | 0.52790 | 12.1 | 0.05572 | 6.1  | 0.86 | 428 | 43  | 430  | 43  | 4    |     |            |     |    |      |   |   |     |

|              |     |        |      |     |      |        |         |       |         |       |         |      |      |     |     |     |     |      |     |            |     |     |      |   |   |     |
|--------------|-----|--------|------|-----|------|--------|---------|-------|---------|-------|---------|------|------|-----|-----|-----|-----|------|-----|------------|-----|-----|------|---|---|-----|
| D66-seq1-a60 | 060 | 2829   | 52   | 9   | 0.71 | 4416   | 0.06009 | 9.1   | 0.57988 | 21.0  | 0.06999 | 18.9 | 0.43 | 376 | 33  | 464 | 81  | 928  | 389 | 41         | 68  | 41  | 0.60 | 7 | 1 | S24 |
| D66-seq2-b01 | 061 | 61141  | 671  | 68  | 0.29 | 4046   | 0.08753 | 1.8   | 0.70743 | 2.3   | 0.05862 | 1.5  | 0.76 | 541 | 9   | 543 | 10  | 553  | 33  | <b>98</b>  | 78  | 42  | 0.54 | 6 | 2 | S18 |
| D66-seq2-b02 | 062 | 708    | 6    | 1   | 1.17 | 1149   | 0.08451 | 4.9   | 0.60754 | 24.4  | 0.05214 | 23.9 | 0.20 | 523 | 24  | 482 | 98  | 291  | 547 | 179        | 75  | 51  | 0.67 | 7 | 2 | S22 |
| D66-seq2-b03 | 063 | 15292  | 404  | 70  | 0.54 | 3644   | 0.04318 | 1.5   | 0.32361 | 2.0   | 0.05435 | 1.4  | 0.73 | 273 | 4   | 285 | 5   | 386  | 32  | 71         | 81  | 62  | 0.77 | 6 | 1 | x   |
| D66-seq2-b04 | 064 | 58438  | 726  | 71  | 0.37 | 18057  | 0.08882 | 2.4   | 0.72357 | 2.6   | 0.05908 | 0.9  | 0.94 | 549 | 13  | 553 | 11  | 570  | 20  | <b>96</b>  | 115 | 61  | 0.53 | 5 | 2 | P5  |
| D66-seq2-b05 | 065 | 51974  | 640  | 64  | 0.51 | 12649  | 0.08936 | 1.8   | 0.73626 | 2.2   | 0.05976 | 1.2  | 0.84 | 552 | 10  | 560 | 9   | 595  | 26  | <b>93</b>  | 93  | 57  | 0.61 | 6 | 1 | S09 |
| D66-seq2-b06 | 066 | 4571   | 109  | 16  | 0.64 | 1802   | 0.03292 | 9.5   | 0.29076 | 17.4  | 0.06407 | 14.5 | 0.55 | 209 | 20  | 259 | 41  | 744  | 307 | 28         | 47  | 32  | 0.68 | 8 | 2 | x   |
| D66-seq2-b07 | 067 | 74955  | 898  | 95  | 0.09 | 5751   | 0.09257 | 1.6   | 0.74931 | 1.7   | 0.05871 | 0.8  | 0.90 | 571 | 9   | 568 | 8   | 556  | 17  | <b>103</b> | 133 | 65  | 0.49 | 5 | 3 | x   |
| D66-seq2-b08 | 068 | 252077 | 1524 | 153 | 0.10 | 152    | 0.07320 | 1.7   | 0.55021 | 3.3   | 0.05452 | 2.8  | 0.53 | 455 | 8   | 445 | 12  | 392  | 62  | 116        | 110 | 60  | 0.55 | 5 | 2 | S14 |
| D66-seq2-b09 | 069 | 37022  | 454  | 46  | 0.71 | 10832  | 0.09286 | 1.7   | 0.76071 | 2.1   | 0.05942 | 1.2  | 0.82 | 572 | 9   | 574 | 9   | 582  | 26  | <b>98</b>  | 122 | 58  | 0.48 | 6 | 2 | S19 |
| D66-seq2-b10 | 070 | 84350  | 1020 | 109 | 0.09 | 9923   | 0.09227 | 1.6   | 0.75101 | 1.9   | 0.05903 | 1.0  | 0.84 | 569 | 9   | 569 | 8   | 568  | 23  | <b>100</b> | 95  | 45  | 0.48 | 5 | 1 | P3  |
| D66-seq2-b11 | 071 | 4482   | 82   | 16  | 0.80 | 6898   | 0.04716 | 14.1  | 0.51789 | 21.7  | 0.07964 | 16.5 | 0.65 | 297 | 41  | 424 | 78  | 1188 | 326 | 25         | 75  | 72  | 0.97 | 7 | 2 | x   |
| D66-seq2-b12 | 072 | 24082  | 320  | 32  | 0.72 | 12103  | 0.09003 | 1.6   | 0.73234 | 2.4   | 0.05900 | 1.8  | 0.66 | 556 | 8   | 558 | 10  | 567  | 40  | <b>98</b>  | 69  | 48  | 0.69 | 5 | 2 | S15 |
| D66-seq2-b13 | 073 | 86030  | 1272 | 124 | 0.09 | 3675   | 0.08751 | 1.4   | 0.72822 | 2.3   | 0.06035 | 1.8  | 0.63 | 541 | 8   | 556 | 10  | 616  | 39  | 88         | 174 | 68  | 0.39 | 4 | 3 | S15 |
| D66-seq2-b14 | 074 | 57479  | 756  | 75  | 0.21 | 100116 | 0.08445 | 1.9   | 0.67997 | 2.1   | 0.05840 | 1.0  | 0.88 | 523 | 9   | 527 | 9   | 545  | 23  | <b>96</b>  | 67  | 45  | 0.68 | 8 | 2 | x   |
| D66-seq2-b15 | 075 | 22573  | 253  | 25  | 0.40 | 5103   | 0.08569 | 2.7   | 0.76003 | 3.7   | 0.06433 | 2.5  | 0.73 | 530 | 14  | 574 | 16  | 752  | 53  | 70         | 62  | 36  | 0.58 | 6 | 2 | S04 |
| D66-seq2-b16 | 076 | 48419  | 645  | 63  | 0.47 | 17402  | 0.08804 | 1.6   | 0.71720 | 2.1   | 0.05908 | 1.3  | 0.78 | 544 | 9   | 549 | 9   | 570  | 29  | <b>95</b>  | 77  | 61  | 0.79 | 4 | 2 | S14 |
| D66-seq2-b17 | 077 | 70610  | 854  | 88  | 0.15 | 7707   | 0.08836 | 1.7   | 0.72034 | 2.0   | 0.05913 | 1.0  | 0.85 | 546 | 9   | 551 | 8   | 572  | 23  | <b>95</b>  | 71  | 51  | 0.72 | 5 | 1 | J3  |
| D66-seq2-b18 | 078 | 63280  | 810  | 78  | 0.19 | 9391   | 0.08510 | 1.6   | 0.67993 | 1.9   | 0.05795 | 1.1  | 0.83 | 526 | 8   | 527 | 8   | 528  | 24  | <b>100</b> | 126 | 72  | 0.57 | 6 | 2 | S19 |
| D66-seq2-b19 | 079 | 84706  | 1156 | 111 | 0.14 | 21571  | 0.08374 | 1.8   | 0.67662 | 2.2   | 0.05860 | 1.3  | 0.81 | 518 | 9   | 525 | 9   | 552  | 29  | <b>94</b>  | 87  | 55  | 0.63 | 5 | 2 | S18 |
| D66-seq2-b20 | 080 | 2105   | 24   | 5   | 1.47 | 3060   | 0.07424 | 9.7   | 0.73011 | 14.7  | 0.07133 | 11.1 | 0.66 | 462 | 44  | 557 | 65  | 967  | 226 | 48         | 74  | 68  | 0.92 | 9 | 1 | x   |
| D66-seq2-b21 | 081 | 13238  | 84   | 10  | 1.39 | 20223  | 0.09274 | 7.7   | 0.76530 | 23.4  | 0.05985 | 22.1 | 0.33 | 572 | 42  | 577 | 108 | 598  | 478 | <b>96</b>  | 64  | 29  | 0.45 | 7 | 2 | S04 |
| D66-seq2-b22 | 082 | 61370  | 794  | 82  | 0.21 | 106099 | 0.09052 | 1.5   | 0.73355 | 1.9   | 0.05877 | 1.3  | 0.76 | 559 | 8   | 559 | 8   | 559  | 28  | <b>100</b> | 96  | 82  | 0.85 | 5 | 2 | S17 |
| D66-seq2-b23 | 083 | 84514  | 1661 | 123 | 0.08 | 18150  | 0.06488 | 2.2   | 0.49315 | 2.4   | 0.05513 | 0.9  | 0.92 | 405 | 9   | 407 | 8   | 417  | 20  | <b>97</b>  | 145 | 69  | 0.47 | 5 | 2 | P4  |
| D66-seq2-b24 | 084 | 55896  | 724  | 72  | 0.31 | 38407  | 0.08734 | 2.0   | 0.70406 | 2.4   | 0.05847 | 1.3  | 0.84 | 540 | 11  | 541 | 10  | 547  | 28  | <b>99</b>  | 86  | 47  | 0.55 | 7 | 2 | S23 |
| D66-seq2-b25 | 085 | 50595  | 659  | 62  | 0.60 | 23589  | 0.08547 | 1.8   | 0.68345 | 2.0   | 0.05799 | 1.0  | 0.88 | 529 | 9   | 529 | 8   | 530  | 21  | <b>100</b> | 78  | 55  | 0.70 | 7 | 2 | S08 |
| D66-seq2-b26 | 086 | 31415  | 418  | 40  | 0.55 | 28461  | 0.08407 | 1.7   | 0.68069 | 2.2   | 0.05872 | 1.3  | 0.80 | 520 | 9   | 527 | 9   | 557  | 28  | <b>93</b>  | 81  | 45  | 0.55 | 6 | 2 | S10 |
| D66-seq2-b27 | 087 | 641    | 10   | 1   | 1.07 | 664    | 0.04734 | 16.8  | 0.36522 | 30.7  | 0.05595 | 25.6 | 0.55 | 298 | 49  | 316 | 87  | 450  | 570 | 66         | 49  | 34  | 0.68 | 8 | 1 | x   |
| D66-seq2-b28 | 088 | 100479 | 1351 | 135 | 0.08 | 112989 | 0.08676 | 2.1   | 0.69597 | 2.3   | 0.05818 | 0.9  | 0.91 | 536 | 11  | 536 | 10  | 537  | 21  | <b>100</b> | 172 | 101 | 0.59 | 5 | 2 | P4  |
| D66-seq2-b29 | 089 | 89842  | 1596 | 113 | 0.08 | 691    | 0.06415 | 1.9   | 0.47029 | 2.6   | 0.05317 | 1.8  | 0.72 | 401 | 7   | 391 | 8   | 336  | 41  | 119        | 180 | 85  | 0.48 | 5 | 2 | S25 |
| D66-seq2-b30 | 090 | 75473  | 745  | 80  | 0.12 | 937    | 0.08898 | 1.9   | 0.71960 | 2.2   | 0.05866 | 1.0  | 0.88 | 549 | 10  | 550 | 9   | 554  | 23  | <b>99</b>  | 111 | 66  | 0.60 | 5 | 2 | S25 |
| D66-seq2-b31 | 091 | 89378  | 1075 | 82  | 0.11 | 699    | 0.06026 | 2.2   | 0.47481 | 2.9   | 0.05714 | 1.8  | 0.78 | 377 | 8   | 395 | 9   | 497  | 39  | 76         | 165 | 98  | 0.59 | 5 | 1 | P3  |
| D66-seq2-b32 | 092 | 1426   | 17   | 2   | 1.35 | 619    | 0.08712 | 11.1  | 0.84416 | 15.5  | 0.07028 | 10.8 | 0.72 | 538 | 58  | 621 | 75  | 936  | 221 | 58         | 74  | 36  | 0.49 | 7 | 2 | x   |
| D66-seq2-b33 | 093 | 42690  | 527  | 40  | 0.52 | 787    | 0.06765 | 1.9   | 0.52802 | 3.2   | 0.05661 | 2.6  | 0.59 | 422 | 8   | 430 | 11  | 476  | 57  | 89         | 97  | 39  | 0.41 | 6 | 2 | S23 |
| D66-seq2-b34 | 094 | 42072  | 577  | 46  | 0.60 | 1382   | 0.07514 | 2.0   | 0.59322 | 2.4   | 0.05726 | 1.3  | 0.83 | 467 | 9   | 473 | 9   | 501  | 29  | <b>93</b>  | 74  | 59  | 0.80 | 8 | 1 | x   |
| D66-seq2-b35 | 095 | 60966  | 832  | 84  | 0.18 | 47422  | 0.08690 | 1.7   | 0.69550 | 1.9   | 0.05805 | 0.8  | 0.90 | 537 | 9   | 536 | 8   | 532  | 18  | <b>101</b> | 112 | 61  | 0.55 | 5 | 2 | S09 |
| D66-seq2-b36 | 096 | 36914  | 509  | 47  | 0.66 | 51969  | 0.08338 | 1.6   | 0.68768 | 1.9   | 0.05981 | 0.9  | 0.87 | 516 | 8   | 531 | 8   | 597  | 20  | 86         | 68  | 41  | 0.60 | 7 | 1 | S25 |
| D66-seq2-b37 | 097 | 71796  | 994  | 94  | 0.11 | 6013   | 0.08135 | 1.8   | 0.65096 | 2.0   | 0.05804 | 0.8  | 0.92 | 504 | 9   | 509 | 8   | 531  | 17  | <b>95</b>  | 84  | 45  | 0.54 | 8 | 2 | x   |
| D66-seq2-b38 | 098 | 998    | 16   | 1   | 0.68 | 1427   | 0.07361 | 4.6   | 0.57193 | 6.8   | 0.05635 | 5.0  | 0.68 | 458 | 21  | 459 | 26  | 466  | 111 | <b>98</b>  | 75  | 39  | 0.52 | 7 | 3 | x   |
| D66-seq2-b39 | 099 | 135604 | 1819 | 149 | 0.12 | 774    | 0.06660 | 1.7   | 0.50688 | 2.1   | 0.05520 | 1.4  | 0.78 | 416 | 7   | 416 | 7   | 420  | 30  | <b>99</b>  | 76  | 54  | 0.72 | 6 | 2 | S25 |
| D66-seq2-b40 | 100 | 110083 | 1290 | 114 | 0.10 | 903    | 0.07452 | 2.5   | 0.58286 | 2.9   | 0.05673 | 1.5  | 0.85 | 463 | 11  | 466 | 11  | 481  | 34  | <b>96</b>  | 77  | 61  | 0.79 | 6 | 3 | x   |
| D66-seq2-b41 | 101 | 48114  | 747  | 64  | 0.23 | 1939   | 0.07786 | 2.6   | 0.61005 | 3.0   | 0.05682 | 1.3  | 0.90 | 483 | 12  | 484 | 11  | 485  | 29  | <b>100</b> | 71  | 40  | 0.56 | 7 | 3 | x   |
| D66-seq2-b42 | 102 | 1056   | 19   | 1   | 1.37 | 902    | 0.05162 | 9.9   | 0.47725 | 17.1  | 0.06706 | 13.9 | 0.58 | 324 | 31  | 396 | 58  | 840  | 289 | 39         | 65  | 61  | 0.93 | 8 | 2 | x   |
| D66-seq2-b43 | 103 | 1127   | 16   | 1   | 1.60 | 1876   | 0.06170 | 13.9  | 0.50110 | 18.2  | 0.05891 | 11.7 | 0.77 | 386 | 52  | 412 | 64  | 564  | 255 | 68         | 38  | 29  | 0.75 | 7 | 2 | x   |
| D66-seq2-b44 | 104 | -      | -    | -   | -    | -      | -       | -     | -       | -     | -       | -    | -    | -   | -   | -   | -   | -    | -   | -          | 46  | 37  | 0.80 | 7 | 1 | S17 |
| D66-seq2-b45 | 105 | 32428  | 450  | 42  | 0.86 | 3520   | 0.08347 | 1.6   | 0.68395 | 2.3   | 0.05943 | 1.6  | 0.70 | 517 | 8   | 529 | 10  | 583  | 36  | 89         | 47  | 41  | 0.88 | 6 | 2 | S13 |
| D66-seq2-b46 | 106 | 60351  | 804  | 83  | 0.22 | 25032  | 0.08970 | 1.8   | 0.72622 | 1.9   | 0.05872 | 0.8  | 0.91 | 554 | 9   | 554 | 8   | 557  | 18  | <b>99</b>  | 104 | 54  | 0.52 | 5 | 3 | S15 |
| D66-seq2-b47 | 107 | 30183  | 405  | 40  | 0.79 | 10652  | 0.08787 | 1.6   | 0.73197 | 2.1   | 0.06042 | 1.3  | 0.78 | 543 | 8   | 558 | 9   | 619  | 28  | 88         | 54  | 47  | 0.86 | 7 | 1 | S20 |
| D66-seq2-b48 | 108 | 56077  | 821  | 77  | 0.24 | 12002  | 0.08183 | 1.9   | 0.66170 | 2.1   | 0.05865 | 0.9  | 0.91 | 507 | 9   | 516 | 9   | 554  | 19  | <b>92</b>  | 102 | 51  | 0.50 | 7 | 1 | S15 |
| D66-seq2-b49 | 109 | 682    | 11   | 1   | 3.44 | 998    | 0.05859 | 16.1  | 0.56262 | 20.4  | 0.06965 | 12.5 | 0.79 | 367 | 58  | 453 | 77  | 918  | 257 | 40         | 66  | 45  | 0.68 | 7 | 1 | x   |
| D66-seq2-b50 | 110 | 13791  | 406  | 42  | 0.42 | 5738   | 0.04499 | 2.0   | 0.32255 | 2.7   | 0.05199 | 1.8  | 0.74 | 284 | 6   | 284 | 7   | 285  | 42  | <b>99</b>  | 108 | 81  | 0.75 | 7 | 2 | x   |
| D66-seq2-b51 | 111 | 1054   | 7    | 1   | 4.41 | 167    | 0.01191 | 154.4 | 0.17461 | 158.7 | 0.10635 | 36.9 | 0.97 | 76  | 118 | 163 | 273 | 1738 | 677 | 4          | 61  | 45  | 0.74 | 7 | 2 | S19 |
| D66-seq2-b52 | 112 | 62074  | 854  | 89  | 0.14 | 3146   | 0.09119 | 1.6   | 0.71692 | 2.2   | 0.05702 | 1.4  | 0.75 | 563 | 9   | 549 | 9   | 492  | 32  | 114        | 80  | 46  | 0.57 | 6 | 2 | S15 |
| D66-seq2-b53 | 113 | 223    |      |     |      |        |         |       |         |       |         |      |      |     |     |     |     |      |     |            |     |     |      |   |   |     |

|               |      |        |      |     |      |        |         |      |         |      |         |      |      |     |     |     |     |      |      |            |     |    |      |    |   |     |
|---------------|------|--------|------|-----|------|--------|---------|------|---------|------|---------|------|------|-----|-----|-----|-----|------|------|------------|-----|----|------|----|---|-----|
| D66b-seq1-a01 | 001  | 70121  | 534  | 55  | 0.34 | 7423   | 0.09586 | 1.8  | 0.79942 | 2.3  | 0.06048 | 1.4  | 0.77 | 590 | 10  | 597 | 10  | 621  | 31   | <b>95</b>  | 112 | 70 | 0.63 | 6  | 2 | S04 |
| D66b-seq1-a02 | 002  | 32600  | 283  | 28  | 0.49 | 3095   | 0.09567 | 2.1  | 0.83638 | 3.0  | 0.06341 | 2.1  | 0.71 | 589 | 12  | 617 | 14  | 722  | 45   | 82         | 89  | 63 | 0.71 | 6  | 2 | S15 |
| D66b-seq1-a03 | 003  | 126108 | 1072 | 106 | 0.06 | 132696 | 0.09135 | 1.8  | 0.71664 | 2.1  | 0.05690 | 1.0  | 0.88 | 563 | 10  | 549 | 9   | 488  | 22   | 116        | 155 | 83 | 0.53 | 5  | 2 | S10 |
| D66b-seq1-a04 | 003A | 4208   | 26   | 2   | 0.75 | 2033   | 0.05219 | 21.9 | 0.55215 | 31.1 | 0.07673 | 22.1 | 0.70 | 328 | 70  | 446 | 119 | 1114 | 442  | 29         | 66  | 40 | 0.62 | 9  | 2 | x   |
| -             | 004  | -      | -    | -   | -    | -      | -       | -    | -       | -    | -       | -    | -    | -   | -   | -   | -   | -    | -    | -          | 92  | 48 | 0.52 | 7  | 2 | S14 |
| -             | 005  | -      | -    | -   | -    | -      | -       | -    | -       | -    | -       | -    | -    | -   | -   | -   | -   | -    | -    | -          | 96  | 45 | 0.47 | 6  | 2 | S04 |
| -             | 006  | -      | -    | -   | -    | -      | -       | -    | -       | -    | -       | -    | -    | -   | -   | -   | -   | -    | -    | -          | 103 | 62 | 0.60 | 6  | 2 | S14 |
| -             | 007  | -      | -    | -   | -    | -      | -       | -    | -       | -    | -       | -    | -    | -   | -   | -   | -   | -    | -    | -          | 85  | 48 | 0.57 | 6  | 2 | S15 |
| -             | 008  | -      | -    | -   | -    | -      | -       | -    | -       | -    | -       | -    | -    | -   | -   | -   | -   | -    | -    | -          | 94  | 54 | 0.57 | 7  | 2 | S09 |
| D66b-seq1-a05 | 009  | 76833  | 672  | 70  | 0.30 | 2104   | 0.09563 | 1.6  | 0.79840 | 2.2  | 0.06055 | 1.5  | 0.74 | 589 | 9   | 596 | 10  | 623  | 32   | <b>94</b>  | 146 | 91 | 0.63 | 5  | 1 | S20 |
| -             | 010  | -      | -    | -   | -    | -      | -       | -    | -       | -    | -       | -    | -    | -   | -   | -   | -   | -    | -    | -          | 106 | 52 | 0.49 | 7  | 2 | S24 |
| -             | 011  | -      | -    | -   | -    | -      | -       | -    | -       | -    | -       | -    | -    | -   | -   | -   | -   | -    | -    | -          | 92  | 52 | 0.56 | 8  | 2 | x   |
| -             | 012  | -      | -    | -   | -    | -      | -       | -    | -       | -    | -       | -    | -    | -   | -   | -   | -   | -    | -    | -          | 83  | 61 | 0.74 | 6  | 2 | P2  |
| -             | 013  | -      | -    | -   | -    | -      | -       | -    | -       | -    | -       | -    | -    | -   | -   | -   | -   | -    | -    | -          | 74  | 49 | 0.66 | 7  | 2 | S04 |
| -             | 014  | -      | -    | -   | -    | -      | -       | -    | -       | -    | -       | -    | -    | -   | -   | -   | -   | -    | -    | -          | 58  | 41 | 0.72 | 8  | 1 | x   |
| -             | 015  | -      | -    | -   | -    | -      | -       | -    | -       | -    | -       | -    | -    | -   | -   | -   | -   | -    | -    | -          | 80  | 41 | 0.51 | 7  | 2 | S03 |
| D66b-seq1-a06 | 016  | 54831  | 526  | 55  | 0.44 | 10471  | 0.09979 | 1.8  | 0.82615 | 2.3  | 0.06005 | 1.4  | 0.79 | 613 | 11  | 611 | 11  | 605  | 30   | <b>101</b> | 99  | 62 | 0.63 | 5  | 1 | S14 |
| -             | 017  | -      | -    | -   | -    | -      | -       | -    | -       | -    | -       | -    | -    | -   | -   | -   | -   | -    | -    | -          | 76  | 40 | 0.52 | 6  | 2 | S12 |
| -             | 018  | -      | -    | -   | -    | -      | -       | -    | -       | -    | -       | -    | -    | -   | -   | -   | -   | -    | -    | -          | 65  | 34 | 0.51 | 7  | 1 | L5  |
| -             | 019  | -      | -    | -   | -    | -      | -       | -    | -       | -    | -       | -    | -    | -   | -   | -   | -   | -    | -    | -          | 57  | 37 | 0.65 | 6  | 1 | J3  |
| -             | 020  | -      | -    | -   | -    | -      | -       | -    | -       | -    | -       | -    | -    | -   | -   | -   | -   | -    | -    | -          | 62  | 48 | 0.78 | 6  | 1 | J4  |
| -             | 021  | -      | -    | -   | -    | -      | -       | -    | -       | -    | -       | -    | -    | -   | -   | -   | -   | -    | -    | -          | 105 | 49 | 0.47 | 10 | 3 | x   |
| -             | 022  | -      | -    | -   | -    | -      | -       | -    | -       | -    | -       | -    | -    | -   | -   | -   | -   | -    | -    | -          | 78  | 42 | 0.54 | 7  | 2 | S05 |
| D66b-seq1-a07 | 023  | 91157  | 808  | 76  | 0.09 | 18109  | 0.08491 | 2.3  | 0.67941 | 2.4  | 0.05803 | 0.7  | 0.95 | 525 | 12  | 526 | 10  | 531  | 16   | <b>99</b>  | 101 | 56 | 0.55 | 5  | 2 | S19 |
| D66b-seq1-a08 | 023A | 54788  | 1075 | 70  | 0.14 | 2798   | 0.03711 | 2.3  | 0.26723 | 3.3  | 0.05223 | 2.3  | 0.70 | 235 | 5   | 240 | 7   | 295  | 53   | 80         | 144 | 91 | 0.64 | 8  | 2 | x   |
| D66b-seq1-a09 | 024  | 82684  | 844  | 86  | 0.09 | 14231  | 0.09305 | 1.6  | 0.75545 | 1.8  | 0.05888 | 0.8  | 0.89 | 574 | 9   | 571 | 8   | 563  | 17   | <b>102</b> | 79  | 61 | 0.77 | 7  | 2 | x   |
| D66b-seq1-a10 | 025  | 91662  | 568  | 65  | 0.11 | 5582   | 0.09782 | 3.8  | 0.81873 | 4.3  | 0.06070 | 1.9  | 0.89 | 602 | 22  | 607 | 20  | 629  | 42   | <b>96</b>  | 78  | 51 | 0.65 | 6  | 2 | S09 |
| D66b-seq1-a11 | 026  | 1004   | 11   | 1   | 1.85 | 903    | 0.08786 | 13.5 | 0.91349 | 62.9 | 0.07541 | 61.5 | 0.21 | 543 | 71  | 659 | 363 | 1079 | 1233 | 50         | 75  | 63 | 0.84 | 7  | 2 | x   |
| -             | 027  | -      | -    | -   | -    | -      | -       | -    | -       | -    | -       | -    | -    | -   | -   | -   | -   | -    | -    | -          | 88  | 48 | 0.54 | 8  | 2 | x   |
| D66b-seq1-a12 | 028  | 88058  | 793  | 87  | 0.10 | 7131   | 0.09940 | 2.1  | 0.82716 | 3.2  | 0.06036 | 2.5  | 0.65 | 611 | 12  | 612 | 15  | 616  | 53   | <b>99</b>  | 126 | 60 | 0.48 | 6  | 1 | S10 |
| -             | 029  | -      | -    | -   | -    | -      | -       | -    | -       | -    | -       | -    | -    | -   | -   | -   | -   | -    | -    | -          | 91  | 44 | 0.49 | 7  | 2 | S10 |
| D66b-seq1-a13 | 030  | 80350  | 814  | 89  | 0.15 | 26267  | 0.10221 | 1.8  | 0.82972 | 2.5  | 0.05888 | 1.8  | 0.71 | 627 | 11  | 613 | 12  | 563  | 38   | 112        | 80  | 57 | 0.71 | 6  | 2 | S15 |
| -             | 031  | -      | -    | -   | -    | -      | -       | -    | -       | -    | -       | -    | -    | -   | -   | -   | -   | -    | -    | -          | 76  | 49 | 0.64 | 7  | 2 | S14 |
| -             | 032  | -      | -    | -   | -    | -      | -       | -    | -       | -    | -       | -    | -    | -   | -   | -   | -   | -    | -    | -          | 91  | 55 | 0.60 | 8  | 2 | x   |
| D66b-seq1-a14 | 033  | 836    | 11   | 1   | 1.64 | 680    | 0.06071 | 21.0 | 0.93612 | 33.4 | 0.11184 | 26.0 | 0.63 | 380 | 78  | 671 | 179 | 1830 | 472  | 21         | 72  | 35 | 0.48 | 6  | 2 | S05 |
| -             | 034  | -      | -    | -   | -    | -      | -       | -    | -       | -    | -       | -    | -    | -   | -   | -   | -   | -    | -    | -          | 80  | 46 | 0.58 | 6  | 2 | S15 |
| -             | 035  | -      | -    | -   | -    | -      | -       | -    | -       | -    | -       | -    | -    | -   | -   | -   | -   | -    | -    | -          | 78  | 48 | 0.62 | 6  | 2 | S05 |
| D66b-seq1-a15 | 036  | 57553  | 676  | 70  | 0.19 | 20851  | 0.09712 | 1.7  | 0.80205 | 2.6  | 0.05989 | 1.9  | 0.66 | 598 | 10  | 598 | 12  | 600  | 42   | <b>100</b> | 98  | 74 | 0.75 | 6  | 2 | x   |
| D66b-seq1-a16 | 037  | 1629   | 5    | 1   | 0.71 | 168    | 0.06901 | 41.6 | 1.60978 | 64.5 | 0.16919 | 49.4 | 0.64 | 430 | 175 | 974 | 516 | 2550 | 827  | 17         | 116 | 45 | 0.38 | 6  | 2 | S04 |
| -             | 038  | -      | -    | -   | -    | -      | -       | -    | -       | -    | -       | -    | -    | -   | -   | -   | -   | -    | -    | -          | 67  | 43 | 0.64 | 7  | 1 | x   |
| D66b-seq1-a17 | 039  | 46331  | 535  | 49  | 0.19 | 6046   | 0.08335 | 6.2  | 0.66462 | 6.6  | 0.05783 | 2.1  | 0.95 | 516 | 31  | 517 | 27  | 524  | 47   | <b>99</b>  | 70  | 44 | 0.63 | 5  | 1 | S05 |
| D66b-seq1-a18 | 039A | -      | -    | -   | -    | -      | -       | -    | -       | -    | -       | -    | -    | -   | -   | -   | -   | -    | -    | -          | -   | -  | -    | -  | - | -   |
| -             | 040  | -      | -    | -   | -    | -      | -       | -    | -       | -    | -       | -    | -    | -   | -   | -   | -   | -    | -    | -          | 87  | 54 | 0.63 | 4  | 2 | x   |
| D66b-seq1-a19 | 041  | -      | -    | -   | -    | -      | -       | -    | -       | -    | -       | -    | -    | -   | -   | -   | -   | -    | -    | -          | 88  | 49 | 0.55 | 8  | 2 | x   |
| -             | 042  | -      | -    | -   | -    | -      | -       | -    | -       | -    | -       | -    | -    | -   | -   | -   | -   | -    | -    | -          | 77  | 49 | 0.64 | 5  | 1 | P3  |
| D66b-seq1-a20 | 043  | 80342  | 838  | 76  | 0.14 | 30024  | 0.08348 | 2.1  | 0.67185 | 2.3  | 0.05837 | 1.0  | 0.90 | 517 | 10  | 522 | 10  | 544  | 22   | <b>95</b>  | 132 | 68 | 0.52 | 6  | 2 | S10 |
| D66b-seq1-a21 | 043A | 1658   | 8    | 1   | 1.05 | 1137   | 0.09080 | 9.1  | 1.40645 | 41.5 | 0.11235 | 40.5 | 0.22 | 560 | 49  | 892 | 282 | 1838 | 734  | 30         | 79  | 44 | 0.55 | 6  | 2 | S20 |
| D66b-seq1-a22 | 043B | -      | -    | -   | -    | -      | -       | -    | -       | -    | -       | -    | -    | -   | -   | -   | -   | -    | -    | -          | 65  | 56 | 0.86 | 9  | 1 | x   |
| -             | 044  | -      | -    | -   | -    | -      | -       | -    | -       | -    | -       | -    | -    | -   | -   | -   | -   | -    | -    | -          | 63  | 39 | 0.62 | 7  | 2 | x   |
| -             | 045  | -      | -    | -   | -    | -      | -       | -    | -       | -    | -       | -    | -    | -   | -   | -   | -   | -    | -    | -          | 108 | 51 | 0.47 | 7  | 2 | S04 |
| -             | 046  | -      | -    | -   | -    | -      | -       | -    | -       | -    | -       | -    | -    | -   | -   | -   | -   | -    | -    | -          | 83  | 46 | 0.55 | 8  | 1 | x   |
| -             | 047  | -      | -    | -   | -    | -      | -       | -    | -       | -    | -       | -    | -    | -   | -   | -   | -   | -    | -    | -          | 106 | 47 | 0.44 | 7  | 3 | S19 |
| -             | 048  | -      | -    | -   | -    | -      | -       | -    | -       | -    | -       | -    | -    | -   | -   | -   | -   | -    | -    | -          | 83  | 49 | 0.59 | 6  | 2 | S20 |
| -             | 049  | -      | -    | -   | -    | -      | -       | -    | -       | -    | -       | -    | -    | -   | -   | -   | -   | -    | -    | -          | 93  | 41 | 0.44 | 7  | 2 | S10 |
| D66b-seq1-a23 | 049A | -      | -    | -   | -    | -      | -       | -    | -       | -    | -       | -    | -    | -   | -   | -   | -   | -    | -    | -          | 78  | 58 | 0.75 | 8  | 2 | x   |
| D66b-seq1-a24 | -    | -      | -    | -   | -    | -      | -       | -    | -       | -    | -       | -    | -    | -   | -   | -   | -   | -    | -    | -          | 58  | 31 | 0.53 | 6  | 1 | J4  |

|               |      |       |      |     |      |        |         |      |         |      |         |      |      |     |    |     |     |      |     |     |     |    |      |    |   |         |
|---------------|------|-------|------|-----|------|--------|---------|------|---------|------|---------|------|------|-----|----|-----|-----|------|-----|-----|-----|----|------|----|---|---------|
| -             | 051  | -     | -    | -   | -    | -      | -       | -    | -       | -    | -       | -    | -    | -   | -  | -   | -   | -    | -   | -   | 78  | 38 | 0.49 | 7  | 2 | S19     |
| -             | 052  | -     | -    | -   | -    | -      | -       | -    | -       | -    | -       | -    | -    | -   | -  | -   | -   | -    | -   | -   | 74  | 48 | 0.65 | 6  | 1 | S15     |
| D66b-seq1-a25 | 053  | 9405  | 44   | 12  | 2.32 | 9645   | 0.03593 | 31.1 | 0.99576 | 37.9 | 0.20100 | 21.6 | 0.82 | 228 | 70 | 702 | 213 | 2834 | 352 | 8   | 58  | 39 | 0.67 | 7  | 2 | x       |
| -             | 054  | -     | -    | -   | -    | -      | -       | -    | -       | -    | -       | -    | -    | -   | -  | -   | -   | -    | -   | -   | 79  | 41 | 0.52 | 8  | 2 | x       |
| -             | 055  | -     | -    | -   | -    | -      | -       | -    | -       | -    | -       | -    | -    | -   | -  | -   | -   | -    | -   | -   | 50  | 31 | 0.62 | 8  | 1 | x       |
| -             | 056  | -     | -    | -   | -    | -      | -       | -    | -       | -    | -       | -    | -    | -   | -  | -   | -   | -    | -   | -   | 75  | 35 | 0.47 | 8  | 1 | x       |
| -             | 057  | -     | -    | -   | -    | -      | -       | -    | -       | -    | -       | -    | -    | -   | -  | -   | -   | -    | -   | -   | 89  | 50 | 0.56 | 6  | 2 | S09     |
| -             | 058  | -     | -    | -   | -    | -      | -       | -    | -       | -    | -       | -    | -    | -   | -  | -   | -   | -    | -   | -   | 115 | 57 | 0.49 | 6  | 2 | S09     |
| D66b-seq1-a26 | 058A | 11398 | 426  | 21  | 0.26 | 1540   | 0.03193 | 22.5 | 0.29812 | 24.8 | 0.06772 | 10.5 | 0.91 | 203 | 45 | 265 | 60  | 860  | 218 | 24  | 103 | 55 | 0.53 | 4  | 1 | S23     |
| -             | 059  | -     | -    | -   | -    | -      | -       | -    | -       | -    | -       | -    | -    | -   | -  | -   | -   | -    | -   | -   | 81  | 33 | 0.41 | 7  | 3 | x       |
| -             | 060  | -     | -    | -   | -    | -      | -       | -    | -       | -    | -       | -    | -    | -   | -  | -   | -   | -    | -   | -   | 78  | 43 | 0.55 | 6  | 1 | S20     |
| -             | 061  | -     | -    | -   | -    | -      | -       | -    | -       | -    | -       | -    | -    | -   | -  | -   | -   | -    | -   | -   | 64  | 23 | 0.35 | 7  | 1 | x       |
| -             | 062  | -     | -    | -   | -    | -      | -       | -    | -       | -    | -       | -    | -    | -   | -  | -   | -   | -    | -   | -   | 62  | 43 | 0.69 | 8  | 2 | x       |
| -             | 063  | -     | -    | -   | -    | -      | -       | -    | -       | -    | -       | -    | -    | -   | -  | -   | -   | -    | -   | -   | 82  | 54 | 0.65 | 8  | 2 | x       |
| D66b-seq1-a27 | 064  | 80965 | 1101 | 106 | 0.09 | 9267   | 0.08397 | 2.1  | 0.67396 | 2.5  | 0.05821 | 1.4  | 0.83 | 520 | 10 | 523 | 10  | 538  | 30  | 97  | 126 | 79 | 0.63 | 6  | 2 | S05     |
| -             | 065  | -     | -    | -   | -    | -      | -       | -    | -       | -    | -       | -    | -    | -   | -  | -   | -   | -    | -   | -   | 63  | 35 | 0.56 | 8  | 1 | x       |
| D66b-seq1-a28 | 066  | 87777 | 1036 | 106 | 0.15 | 154702 | 0.09606 | 1.7  | 0.76795 | 1.9  | 0.05798 | 1.0  | 0.86 | 591 | 10 | 579 | 9   | 529  | 21  | 112 | 139 | 72 | 0.52 | 6  | 2 | S15     |
| -             | 067  | -     | -    | -   | -    | -      | -       | -    | -       | -    | -       | -    | -    | -   | -  | -   | -   | -    | -   | -   | 44  | 29 | 0.66 | 7  | 2 | S13     |
| -             | 068  | -     | -    | -   | -    | -      | -       | -    | -       | -    | -       | -    | -    | -   | -  | -   | -   | -    | -   | -   | 83  | 44 | 0.53 | 7  | 2 | S15     |
| D66b-seq1-a29 | 068A | 8729  | 275  | 30  | 0.55 | 9176   | 0.04599 | 2.0  | 0.34279 | 3.3  | 0.05406 | 2.6  | 0.62 | 290 | 6  | 299 | 9   | 374  | 59  | 78  | 107 | 76 | 0.71 | 6  | 2 | S19     |
| -             | 069  | -     | -    | -   | -    | -      | -       | -    | -       | -    | -       | -    | -    | -   | -  | -   | -   | -    | -   | -   | 96  | 61 | 0.64 | 7  | 2 | S25     |
| -             | 070  | -     | -    | -   | -    | -      | -       | -    | -       | -    | -       | -    | -    | -   | -  | -   | -   | -    | -   | -   | 58  | 53 | 0.93 | 9  | 1 | x       |
| -             | 071  | -     | -    | -   | -    | -      | -       | -    | -       | -    | -       | -    | -    | -   | -  | -   | -   | -    | -   | -   | 80  | 54 | 0.68 | 7  | 2 | S20     |
| D66b-seq1-a30 | 072  | 8535  | 166  | 12  | 0.22 | 666    | 0.07178 | 16.6 | 0.97469 | 18.9 | 0.09848 | 9.1  | 0.88 | 447 | 72 | 691 | 100 | 1596 | 170 | 28  | 87  | 72 | 0.83 | 10 | 3 | x       |
| -             | 073  | -     | -    | -   | -    | -      | -       | -    | -       | -    | -       | -    | -    | -   | -  | -   | -   | -    | -   | -   | 67  | 42 | 0.63 | 6  | 1 | S25     |
| -             | 074  | -     | -    | -   | -    | -      | -       | -    | -       | -    | -       | -    | -    | -   | -  | -   | -   | -    | -   | -   | 92  | 58 | 0.63 | 6  | 2 | S09     |
| D66b-seq1-a31 | 075  | 53250 | 729  | 75  | 0.24 | 90665  | 0.09662 | 2.1  | 0.79768 | 2.6  | 0.05988 | 1.4  | 0.84 | 595 | 12 | 596 | 12  | 599  | 30  | 99  | 112 | 70 | 0.63 | 5  | 2 | S20     |
| -             | 076  | -     | -    | -   | -    | -      | -       | -    | -       | -    | -       | -    | -    | -   | -  | -   | -   | -    | -   | -   | 93  | 58 | 0.62 | 8  | 3 | x       |
| -             | 077  | -     | -    | -   | -    | -      | -       | -    | -       | -    | -       | -    | -    | -   | -  | -   | -   | -    | -   | -   | 70  | 43 | 0.62 | 7  | 1 | x       |
| -             | 078  | -     | -    | -   | -    | -      | -       | -    | -       | -    | -       | -    | -    | -   | -  | -   | -   | -    | -   | -   | 64  | 43 | 0.67 | 8  | 2 | x       |
| -             | 079  | -     | -    | -   | -    | -      | -       | -    | -       | -    | -       | -    | -    | -   | -  | -   | -   | -    | -   | -   | 70  | 41 | 0.59 | 7  | 1 | S15     |
| -             | 080  | -     | -    | -   | -    | -      | -       | -    | -       | -    | -       | -    | -    | -   | -  | -   | -   | -    | -   | -   | 100 | 47 | 0.47 | 6  | 1 | S25     |
| D66b-seq1-a32 | 081  | 60983 | 796  | 80  | 0.14 | 6725   | 0.08933 | 3.0  | 0.72387 | 3.4  | 0.05877 | 1.5  | 0.89 | 552 | 16 | 553 | 15  | 559  | 33  | 99  | 99  | 61 | 0.62 | 5  | 2 | S20     |
| -             | 082  | -     | -    | -   | -    | -      | -       | -    | -       | -    | -       | -    | -    | -   | -  | -   | -   | -    | -   | -   | 69  | 44 | 0.63 | 7  | 2 | x       |
| D66b-seq1-a33 | 083  | 47304 | 666  | 65  | 0.43 | 11015  | 0.08927 | 2.4  | 0.72167 | 2.7  | 0.05863 | 1.3  | 0.87 | 551 | 12 | 552 | 12  | 554  | 29  | 100 | 118 | 54 | 0.46 | 6  | 2 | P4      |
| -             | 084  | -     | -    | -   | -    | -      | -       | -    | -       | -    | -       | -    | -    | -   | -  | -   | -   | -    | -   | -   | 82  | 46 | 0.57 | 6  | 3 | x       |
| D66b-seq1-a34 | 085  | 64246 | 834  | 83  | 0.24 | 32099  | 0.08920 | 2.4  | 0.72747 | 2.8  | 0.05915 | 1.3  | 0.88 | 551 | 13 | 555 | 12  | 573  | 29  | 96  | 110 | 60 | 0.55 | 6  | 2 | S10     |
| D66b-seq1-a35 | 086  | 17359 | 271  | 18  | 0.34 | 7803   | 0.06002 | 9.3  | 0.54300 | 27.9 | 0.06562 | 26.3 | 0.33 | 376 | 34 | 440 | 105 | 794  | 551 | 47  | 101 | 55 | 0.54 | 7  | 2 | x       |
| -             | 087  | -     | -    | -   | -    | -      | -       | -    | -       | -    | -       | -    | -    | -   | -  | -   | -   | -    | -   | -   | 104 | 47 | 0.45 | 6  | 2 | S05     |
| D66b-seq1-a36 | 088  | 41774 | 642  | 49  | 0.39 | 71643  | 0.07010 | 4.7  | 0.57159 | 5.5  | 0.05914 | 2.9  | 0.85 | 437 | 20 | 459 | 20  | 572  | 63  | 76  | 105 | 71 | 0.67 | 7  | 2 | x       |
| -             | 089  | -     | -    | -   | -    | -      | -       | -    | -       | -    | -       | -    | -    | -   | -  | -   | -   | -    | -   | -   | 101 | 57 | 0.56 | 7  | 2 | x       |
| -             | 090  | -     | -    | -   | -    | -      | -       | -    | -       | -    | -       | -    | -    | -   | -  | -   | -   | -    | -   | -   | 76  | 61 | 0.80 | 8  | 2 | x       |
| D66b-seq1-a37 | 091  | 27311 | 409  | 46  | 0.57 | 2553   | 0.10692 | 1.7  | 0.99639 | 4.8  | 0.06759 | 4.5  | 0.35 | 655 | 11 | 702 | 25  | 856  | 94  | 76  | 80  | 50 | 0.62 | 6  | 2 | S25     |
| -             | 092  | -     | -    | -   | -    | -      | -       | -    | -       | -    | -       | -    | -    | -   | -  | -   | -   | -    | -   | -   | 85  | 37 | 0.43 | 6  | 1 | x       |
| D66b-seq1-a38 | 093  | 51087 | 673  | 63  | 0.51 | 12417  | 0.08638 | 2.0  | 0.69301 | 2.5  | 0.05819 | 1.6  | 0.78 | 534 | 10 | 535 | 11  | 537  | 35  | 99  | 141 | 74 | 0.52 | 6  | 2 | P4      |
| -             | 094  | -     | -    | -   | -    | -      | -       | -    | -       | -    | -       | -    | -    | -   | -  | -   | -   | -    | -   | -   | 63  | 27 | 0.42 | 7  | 1 | x       |
| -             | 095  | -     | -    | -   | -    | -      | -       | -    | -       | -    | -       | -    | -    | -   | -  | -   | -   | -    | -   | -   | 100 | 59 | 0.59 | 10 | 2 | x       |
| -             | 096  | -     | -    | -   | -    | -      | -       | -    | -       | -    | -       | -    | -    | -   | -  | -   | -   | -    | -   | -   | 77  | 39 | 0.50 | 7  | 1 | S04     |
| -             | 097  | -     | -    | -   | -    | -      | -       | -    | -       | -    | -       | -    | -    | -   | -  | -   | -   | -    | -   | -   | 57  | 44 | 0.77 | 8  | 2 | x       |
| -             | 098  | -     | -    | -   | -    | -      | -       | -    | -       | -    | -       | -    | -    | -   | -  | -   | -   | -    | -   | -   | 89  | 49 | 0.55 | 7  | 2 | S15     |
| -             | 099  | -     | -    | -   | -    | -      | -       | -    | -       | -    | -       | -    | -    | -   | -  | -   | -   | -    | -   | -   | 87  | 53 | 0.62 | 7  | 2 | S14     |
| -             | 100  | -     | -    | -   | -    | -      | -       | -    | -       | -    | -       | -    | -    | -   | -  | -   | -   | -    | -   | -   | 82  | 46 | 0.57 | 6  | 1 | S13/S15 |
| D66b-seq1-a39 | 101  | 54754 | 573  | 68  | 0.18 | 5071   | 0.09852 | 5.1  | 0.82940 | 7.0  | 0.06106 | 4.7  | 0.74 | 606 | 30 | 613 | 33  | 641  | 101 | 94  | 72  | 47 | 0.66 | 6  | 2 | x       |
| -             | 102  | -     | -    | -   | -    | -      | -       | -    | -       | -    | -       | -    | -    | -   | -  | -   | -   | -    | -   | -   | 69  | 41 | 0.60 | 4  | 1 | S13     |
| D66b-seq1-a40 | 103  | -     | -    | -   | -    | -      | -       | -    | -       | -    | -       | -    | -    | -   | -  | -   | -   | -    | -   | -   | 55  | 49 | 0.90 | 7  | 3 | x       |
| -             | 104  | -     | -    | -   | -    | -      | -       | -    | -       | -    | -       | -    | -    | -   | -  | -   | -   | -    | -   | -   | 58  | 26 | 0.45 | 6  | 1 | x       |







|              |      |        |     |    |      |       |         |     |         |      |         |      |      |      |    |      |     |      |     |            |     |    |      |    |   |         |
|--------------|------|--------|-----|----|------|-------|---------|-----|---------|------|---------|------|------|------|----|------|-----|------|-----|------------|-----|----|------|----|---|---------|
| D67-seq2-b52 | 111A | -      | -   | -  | -    | -     | -       | -   | -       | -    | -       | -    | -    | -    | -  | -    | -   | -    | -   | -          | 71  | 55 | 0.77 | 10 | 2 | x       |
| D67-seq2-b53 | 112  | 30631  | 280 | 30 | 0.76 | 809   | 0.08415 | 1.8 | 0.67345 | 3.6  | 0.05804 | 3.1  | 0.51 | 521  | 9  | 523  | 15  | 531  | 68  | <b>98</b>  | 97  | 57 | 0.59 | 3  | 2 | S24     |
| D67-seq2-b54 | 113  | 24157  | 129 | 18 | 0.92 | 225   | 0.10739 | 2.0 | 1.81767 | 4.1  | 0.12276 | 3.6  | 0.48 | 658  | 12 | 1052 | 27  | 1997 | 65  | 33         | 71  | 34 | 0.48 | 4  | 1 | S24     |
| D67-seq2-b55 | 114  | 13857  | 163 | 18 | 0.61 | 7385  | 0.09462 | 1.8 | 0.78481 | 4.1  | 0.06016 | 3.7  | 0.45 | 583  | 10 | 588  | 18  | 609  | 79  | <b>96</b>  | 132 | 57 | 0.43 | 4  | 1 | J4      |
| D67-seq2-b56 | 115  | 18532  | 187 | 21 | 0.75 | 1956  | 0.09591 | 1.6 | 0.79631 | 4.3  | 0.06022 | 4.0  | 0.36 | 590  | 9  | 595  | 20  | 611  | 87  | <b>97</b>  | 108 | 64 | 0.59 | 2  | 1 | J5      |
| D67-seq2-b57 | 116  | 11212  | 122 | 14 | 0.76 | 2652  | 0.09527 | 1.7 | 0.88710 | 3.4  | 0.06754 | 2.9  | 0.50 | 587  | 10 | 645  | 16  | 854  | 61  | 69         | 105 | 36 | 0.34 | 4  | 2 | S23/S24 |
| D67-seq2-b58 | 117  | 19356  | 141 | 16 | 0.80 | 379   | 0.08849 | 2.2 | 1.16262 | 5.4  | 0.09529 | 4.9  | 0.41 | 547  | 12 | 783  | 30  | 1534 | 92  | 36         | 54  | 31 | 0.58 | 6  | 1 | x       |
| D67-seq2-b59 | 118  | 20637  | 167 | 20 | 0.72 | 544   | 0.10023 | 1.8 | 0.83873 | 4.2  | 0.06069 | 3.8  | 0.43 | 616  | 11 | 618  | 20  | 628  | 82  | <b>98</b>  | 69  | 40 | 0.58 | 5  | 1 | J5      |
| D67-seq2-b60 | 119  | 18328  | 96  | 9  | 0.76 | 217   | 0.06765 | 2.5 | 1.20955 | 7.4  | 0.12967 | 7.0  | 0.33 | 422  | 10 | 805  | 42  | 2093 | 123 | 20         | 95  | 38 | 0.39 | 4  | 2 | S24     |
| D67-seq3-c01 | 120  | 81257  | 97  | 25 | 0.58 | 50    | 0.11158 | 2.9 | 5.84542 | 8.8  | 0.37995 | 8.3  | 0.32 | 682  | 19 | 1953 | 80  | 3832 | 126 | 18         | 101 | 52 | 0.52 | 2  | 1 | J3      |
| D67-seq3-c02 | 121  | 7708   | 87  | 9  | 0.44 | 12405 | 0.09260 | 1.7 | 0.79823 | 2.5  | 0.06252 | 1.9  | 0.66 | 571  | 9  | 596  | 12  | 692  | 41  | 82         | 111 | 53 | 0.48 | 8  | 2 | x       |
| D67-seq3-c03 | 122  | 9170   | 103 | 10 | 0.41 | 2779  | 0.08851 | 2.4 | 0.76145 | 5.7  | 0.06239 | 5.2  | 0.42 | 547  | 13 | 575  | 25  | 688  | 111 | 80         | 138 | 77 | 0.55 | 3  | 2 | J3      |
| D67-seq3-c04 | 123  | 7782   | 64  | 7  | 0.64 | 318   | 0.08979 | 2.4 | 1.14522 | 5.5  | 0.09250 | 4.9  | 0.43 | 554  | 13 | 775  | 30  | 1478 | 94  | 38         | 108 | 60 | 0.55 | 2  | 1 | S24     |
| D67-seq3-c05 | 124  | 12408  | 142 | 15 | 0.71 | 21010 | 0.09173 | 1.9 | 0.75265 | 2.3  | 0.05951 | 1.4  | 0.80 | 566  | 10 | 570  | 10  | 586  | 30  | <b>97</b>  | 112 | 58 | 0.51 | 3  | 2 | S24     |
| D67-seq3-c06 | 125  | 9881   | 112 | 12 | 0.67 | 8454  | 0.09337 | 1.7 | 0.77182 | 2.4  | 0.05995 | 1.6  | 0.72 | 575  | 10 | 581  | 11  | 602  | 36  | <b>96</b>  | 124 | 56 | 0.45 | 1  | 1 | S23     |
| D67-seq3-c07 | 126  | 38536  | 229 | 30 | 0.63 | 239   | 0.08883 | 2.2 | 0.71579 | 7.1  | 0.05844 | 6.8  | 0.31 | 549  | 12 | 548  | 31  | 546  | 148 | <b>100</b> | 88  | 45 | 0.51 | 3  | 1 | S25     |
| D67-seq3-c08 | 127  | 8827   | 100 | 10 | 0.79 | 1480  | 0.08867 | 1.7 | 0.77633 | 2.8  | 0.06350 | 2.2  | 0.61 | 548  | 9  | 583  | 12  | 725  | 47  | 76         | 99  | 61 | 0.62 | 3  | 1 | S24     |
| D67-seq3-c09 | 128  | -      | -   | -  | -    | -     | -       | -   | -       | -    | -       | -    | -    | -    | -  | -    | -   | -    | -   | -          | 64  | 36 | 0.56 | 4  | 1 | S25     |
| D67-seq3-c10 | 129  | 15369  | 83  | 10 | 0.74 | 265   | 0.09081 | 4.3 | 1.57042 | 16.9 | 0.12542 | 16.3 | 0.26 | 560  | 23 | 959  | 111 | 2035 | 289 | 28         | 73  | 46 | 0.63 | 5  | 2 | S24     |
| D67-seq3-c11 | 130  | 18483  | 177 | 18 | 0.61 | 588   | 0.09259 | 1.9 | 0.75613 | 3.7  | 0.05923 | 3.2  | 0.51 | 571  | 10 | 572  | 17  | 576  | 70  | <b>99</b>  | 79  | 43 | 0.55 | 4  | 2 | J4      |
| D67-seq3-c12 | 131  | 45630  | 95  | 17 | 0.52 | 64    | 0.10112 | 2.3 | 4.09530 | 5.0  | 0.29372 | 4.4  | 0.46 | 621  | 14 | 1653 | 42  | 3437 | 69  | 18         | 109 | 64 | 0.59 | 3  | 2 | S24     |
| D67-seq3-c13 | 132  | 155446 | 297 | 96 | 0.90 | 2480  | 0.26270 | 3.3 | 4.58496 | 3.4  | 0.12658 | 0.9  | 0.96 | 1504 | 44 | 1747 | 29  | 2051 | 16  | 73         | 112 | 60 | 0.54 | 6  | 1 | x       |
| D67-seq3-c14 | 133  | 53500  | 625 | 65 | 0.27 | 4147  | 0.08656 | 2.0 | 0.70004 | 2.2  | 0.05865 | 1.0  | 0.89 | 535  | 10 | 539  | 9   | 554  | 22  | <b>97</b>  | 117 | 51 | 0.43 | 5  | 2 | S23     |
| D67-seq3-c15 | 134  | 32977  | 390 | 37 | 0.33 | 2751  | 0.09938 | 1.9 | 0.83869 | 2.2  | 0.06121 | 1.0  | 0.88 | 611  | 11 | 618  | 10  | 647  | 22  | <b>94</b>  | 77  | 44 | 0.57 | 7  | 1 | x       |
| D67-seq3-c16 | 135  | 8305   | 88  | 9  | 0.41 | 1249  | 0.08895 | 2.0 | 0.89424 | 3.4  | 0.07291 | 2.8  | 0.58 | 549  | 10 | 649  | 17  | 1012 | 57  | 54         | 126 | 61 | 0.48 | 4  | 2 | S23     |
| D67-seq3-c17 | 136  | 97268  | 164 | 57 | 0.60 | 4721  | 0.30707 | 1.8 | 5.44267 | 2.0  | 0.12855 | 0.9  | 0.88 | 1726 | 27 | 1892 | 17  | 2078 | 17  | 83         | 76  | 71 | 0.93 | 7  | 1 | x       |
| D67-seq3-c18 | 137  | 45738  | 127 | 21 | 1.01 | 87    | 0.09736 | 2.3 | 2.96902 | 10.3 | 0.22118 | 10.0 | 0.22 | 599  | 13 | 1400 | 81  | 2989 | 161 | 20         | 88  | 35 | 0.40 | 4  | 2 | S25/S23 |

<sup>a</sup> within-run background-corrected mean <sup>207</sup>Pb signal in counts per second

<sup>b</sup> U and Pb content and Th/U ratio were calculated relative to GJ-1 and are accurate to approximately 10%.

<sup>c</sup> corrected for background, mass bias, laser induced U-Pb fractionation and common Pb (if detectable, see analytical method) using Stacey & Kramers (1975) model Pb composition. <sup>207</sup>Pb/<sup>235</sup>U calculated using <sup>207</sup>Pb/<sup>206</sup>Pb/(<sup>238</sup>U/<sup>206</sup>Pb × 1/137.88). Errors are propagated by quadratic addition of within-run errors (2SE) and the reproducibility of GJ-1 (2SD).

<sup>d</sup> Rho is the error correlation defined as  $\text{err}^{206}\text{Pb}/^{238}\text{U} / \text{err}^{207}\text{Pb}/^{235}\text{U}$ .

c = core, r = rim, m = middle

concordance =  $(\text{AGE}^{206}\text{Pb}/^{238}\text{U}) / (\text{AGE}^{207}\text{Pb}/^{206}\text{Pb}) \times 100$ .
